# Supplementary material for: Phosphine phosphonic amide nickel catalyzed ethylene polymerization and copolymerization with polar monomers
Source: Royal Society of Chemistry journal article supplement (doi:10.1039/c8dt01018h), 2018-01-01
Supplement: c8dt01018h1.pdf [file c8dt01018h1.pdf]

## Supporting Information:

### Contents

|                                                                             |         |
|-----------------------------------------------------------------------------|---------|
| 1. Figures and Tables.....                                                  | S2-S3   |
| 2. Experimental sections                                                    |         |
| 2.1 General Considerations.....                                             | S4      |
| 2.2 Standard Procedure for the Synthesis of Ligand 3.....                   | S4-S5   |
| 2.3 Standard Procedure for the Synthesis of Complex Ni1-Ni3.....            | S6-S7   |
| 2.4 Standard Procedure for the Synthesis of Complex Ni1-Br.....             | S7      |
| 2.5 General in-Situ-Activated Polymerization Procedure.....                 | S7      |
| 2.6 Procedure for Copolymerization of Ethylene and Polar Monomer.....       | S8      |
| 2.7 Procedure for $\alpha$ -olefin oligomerization by nickel complexes..... | S8      |
| 3. Spectra Data.....                                                        | S8-S18  |
| 4. DSC and GPC of polymers.....                                             | S18-S26 |
| 5. X-Ray Crystallography of complex Ni-1.....                               | S27-S28 |
| 6. X-Ray Crystallography of complex Ni-3.....                               | S28-S29 |
| 7. X-Ray Crystallography of complex Ni1-Br.....                             | S30-S31 |

## 1. Figures and Tables

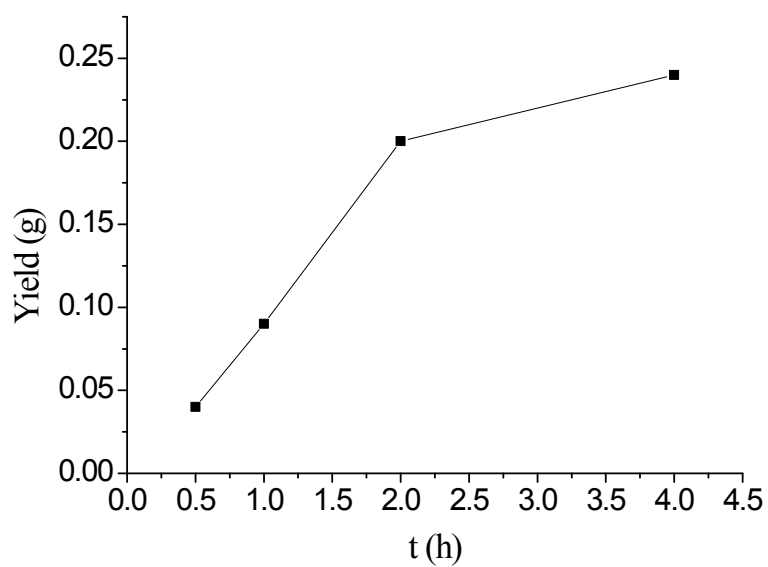

**Figure S1.** Productivity versus time for complex **Ni3** at 30 °C.

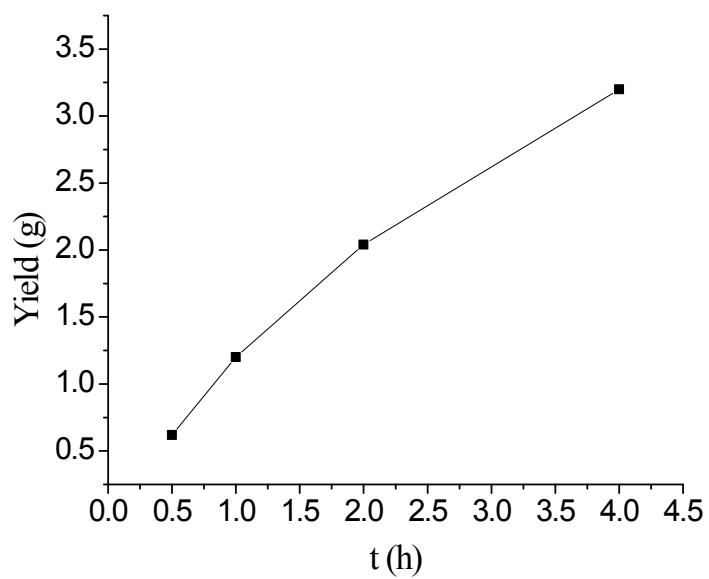

**Figure S2.** Productivity versus time for complex **Ni3** at 80 °C.

**Table S1.** Ethylene homopolymerization with **Ni1-Ni3**<sup>a</sup>

| Ent. | Cat.             | cocatalyst (eq)                                     | T<br>(°C) | Yield<br>(g) | Act. <sup>b</sup> | <i>T</i> <sub>m</sub> <sup>c</sup><br>(°C) |
|------|------------------|-----------------------------------------------------|-----------|--------------|-------------------|--------------------------------------------|
| 1    | <b>Ni1-Br</b>    | MAO (100)                                           | 30        | -            | -                 | -                                          |
| 2    | <b>Ni1-Br</b>    | MAO (100)                                           | 80        | -            | -                 | -                                          |
| 3    | <b>Ni1-allyl</b> | B(C <sub>6</sub> F <sub>5</sub> ) <sub>3</sub> (10) | 80        | 0.19         | 1.9               | 115                                        |
| 4    | <b>Ni1-allyl</b> | MAO (100)                                           | 80        | 0.28         | 2.8               | 118                                        |
| 5    | <b>Ni1-allyl</b> | AlEt <sub>2</sub> Cl (100)                          | 80        | -            | -                 | -                                          |
| 6    | <b>Ni1-allyl</b> | AlEtCl <sub>2</sub> (100)                           | 80        | -            | -                 | -                                          |

<sup>a</sup>Polymerization conditions: 10 μmol catalyst, 18 mL toluene, 2 mL dichloromethane, 9 atm ethylene pressure, 1.2 eq. NaBAF, 1 h. <sup>b</sup>Activity is in unit of 10<sup>4</sup> g·mol<sup>-1</sup>·h<sup>-1</sup>.

<sup>c</sup>Determined by differential scanning calorimetry, third heating.

## 2. Experimental sections

### 2.1 General Considerations

All experiments were carried out under a dry Nitrogen atmosphere using standard Schlenk techniques or in a glove-box. Deuterated solvents used for NMR were dried and distilled prior to use.  $^1\text{H}$ ,  $^{13}\text{C}$  NMR spectra were recorded by a Bruker Ascend Tm 400 spectrometer at ambient temperature unless otherwise stated. The chemical shifts of the  $^1\text{H}$  and  $^{13}\text{C}$  NMR spectra were referenced to the residual solvent; Coupling constants are in Hz. Elemental analysis was performed by the Analytical Center of the University of Science and Technology of China. X-ray Diffraction data were collected at 298(2) K on a Bruker Smart CCD area detector with graphite-monochromated Mo  $\text{K}\alpha$  radiation ( $\lambda = 0.71073 \text{ \AA}$ ). Molecular weight and molecular weight distribution of the polymers were determined by gel permeation chromatography (GPC) with a PL 210 equipped with one Shodex AT-803S and two Shodex AT-806MS columns at 140 °C using o-dichlorobenzene as a solvent and calibrated with polystyrene standards. Dichloromethane, toluene and hexanes were purified by solvent purification systems. Ligands were prepared by literature procedure. All other reagents were purchased from commercial sources and used without purification.

Differential scanning calorimetry (DSC). DSC was performed by a DSC Q20 from TA Instruments. Samples were quickly heated to 150°C and kept for 5 min to remove thermal history, then cooled to 40°C at a rate of 10 K/min, and finally reheated to 120°C at the same rate under a nitrogen flow (50 mL/min). The maximum points endotherm (heating scan) were taken as the melting temperature ( $T_m$ ).

### 2.2 Standard Procedure for the Synthesis of L3

To a solution of phosphinic amide (2.31 mmol) in 20 mL of toluene and TMEDA (0.49 mL, 2.54 mmol) a solution of n-BuLi (1.0 mL of a 2.4 M solution in hexane, 2.4 mmol) was added at - 80 °C. After one hour,  $\text{ClPR}_1\text{R}_2$  ( $\text{R}_1$ :   $\text{R}_2$ : Ph) was added. The reaction was stirred at room temperature for 2 hours and then was poured into ice-water, extracted with dichloromethane (3×15 mL), washed with sodium

thiosulphate (2×15 mL), dried over anhydrous sodium sulphate and evaporated to dryness under vacuum to give a white solid. Purification by column chromatography afforded white solids.

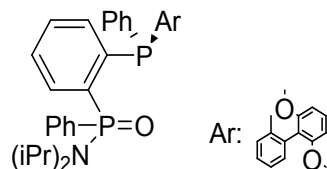

Yield 62% (0.372 g). White solid. <sup>1</sup>H NMR (400 MHz, CDCl<sub>3</sub>): δ 7.93 (s, aryl-*H*), 7.72 (s, aryl-*H*), 7.59 (dd, *J* = 11.2, 8.0 Hz, 1H, aryl-*H*), 7.44 – 7.27 (m, 6H, aryl-*H*), 7.22 – 7.09 (m, 7H, aryl-*H*), 7.00 (dt, *J* = 25.2, 6.8 Hz, 2H, aryl-*H*), 6.90 – 6.75 (m, 2H, aryl-*H*), 6.54 (d, *J* = 8.3 Hz, aryl-*H*), 6.33 (d, *J* = 8.3 Hz, aryl-*H*), 6.23 (d, *J* = 8.2 Hz, aryl-*H*), 5.86 (d, *J* = 8.2 Hz, aryl-*H*), 3.79 (s, 2H, -OCH<sub>3</sub>), 3.65 (s, 1H, -OCH<sub>3</sub>), 3.36 (dd, *J* = 13.7, 6.8 Hz, 2H, -CH(CH<sub>3</sub>)<sub>2</sub>), 3.30 (s, 2H, -OCH<sub>3</sub>), 2.84 (s, 1H, -OCH<sub>3</sub>), 1.11 – 0.98 (m, 12H, -CH(CH<sub>3</sub>)<sub>2</sub>). <sup>31</sup>P NMR (162 MHz, CDCl<sub>3</sub>): δ 31.08 (s), 30.00 (s), -11.74 (s), -12.54 (s). <sup>13</sup>C NMR (101 MHz, CDCl<sub>3</sub>): δ 156.86 (d, *J* = 1.5 Hz), 156.45 (s), 156.40 (d, *J* = 2.0 Hz), 156.02 (s), 143.49 (d, *J* = 12.8 Hz), 143.21 (s), 143.08 (d, *J* = 2.8 Hz), 142.82 (d, *J* = 13.9 Hz), 140.64 (s), 140.46 (d, *J* = 5.7 Hz), 140.24 (s), 140.10 (s), 139.86 (d, *J* = 11.2 Hz), 139.66 (s), 138.89 (d, *J* = 5.6 Hz), 138.68 (d, *J* = 6.1 Hz), 138.19 (s), 137.94 (s), 137.51 (s), 137.28 (s), 136.91 (s), 136.66 (s), 136.26 (s), 136.03 (s), 135.12 (s), 134.96 (s), 134.83 (s), 134.47 (s), 134.10 (s), 133.89 (s), 133.28 (s), 132.75 (d, *J* = 5.8 Hz), 132.54 (d, *J* = 5.3 Hz), 131.91 (d, *J* = 9.7 Hz), 131.55 (dd, *J* = 9.3, 4.9 Hz), 131.22 (d, *J* = 9.2 Hz), 130.00 (d, *J* = 4.5 Hz), 129.91 (d, *J* = 4.4 Hz), 129.41 (m), 129.25 (d, *J* = 2.0 Hz), 129.18 (d, *J* = 2.1 Hz), 127.63 (s), 127.03 (s), 126.95 (s), 126.63 (s), 126.59 (s), 126.51 (t, *J* = 3.6 Hz), 126.14 (d, *J* = 3.8 Hz), 125.95 (d, *J* = 7.4 Hz), 125.59 (d, *J* = 11.4 Hz), 125.26 (d, *J* = 12.0 Hz), 118.17 (d, *J* = 6.1 Hz), 117.67 (s), 103.12 (s), 102.77 (s), 102.15 (s), 101.68 (s), 54.95 (s, -OCH<sub>3</sub>), 54.86 (d, *J* = 1.7 Hz, -OCH<sub>3</sub>), 54.10 (s, -OCH<sub>3</sub>), 46.47 (d, *J* = 3.6 Hz, -CH(CH<sub>3</sub>)<sub>2</sub>), 46.28 (d, *J* = 3.7 Hz, -CH(CH<sub>3</sub>)<sub>2</sub>), 22.63 (d, *J* = 3.2 Hz, -CH(CH<sub>3</sub>)<sub>2</sub>), 22.44 (dd, *J* = 5.1, 3.0 Hz, -CH(CH<sub>3</sub>)<sub>2</sub>), 21.90 (d, *J* = 2.9 Hz, -CH(CH<sub>3</sub>)<sub>2</sub>). <sup>31</sup>P NMR

(162 MHz, CDCl<sub>3</sub>):  $\delta$  31.08 (s, 1H), 30.00 (s, 1H), -11.74 (s, 1H), -12.54 (s, 1H).  
 HRMS (m/z): calcd for C<sub>38</sub>H<sub>42</sub>NO<sub>3</sub>P<sub>2</sub>: 622.2640, found: 622.2627 [M + H]<sup>+</sup>.

### 2.3 Standard Procedure for the Synthesis of Complexes Ni1-Ni3

Ligand (1 mmol) and Ni(COD)<sub>2</sub> (0.96 mmol) were weighed into a small vial on the bench top. Chlorobenzene (5 mL) was added to the solids, and the mixture was stirred at room temperature for 12 hours. Hexane was then layered onto the filtrate and let it stir. After several hours, the yellow solid that had formed was collected by filtration, washed with hexane (3  $\times$  2mL), and dried under vacuum to afford a yellow solid.

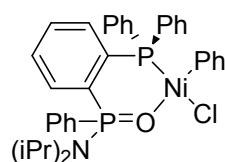

#### Ni1

Yield 72 % (0.453 g). Red solid. <sup>1</sup>H NMR (400 MHz, C<sub>6</sub>D<sub>6</sub>)  $\delta$  8.34 – 7.40 (m, 11H, aryl-*H*), 7.06 – 6.44 (m, 13H, aryl-*H*), 3.36 (s, 2H, -CH(CH<sub>3</sub>)<sub>2</sub>), 1.22 (s, 6H, -CH(CH<sub>3</sub>)<sub>2</sub>), 1.13 (s, 6H, -CH(CH<sub>3</sub>)<sub>2</sub>). <sup>13</sup>C NMR (101 MHz, CDCl<sub>3</sub>)  $\delta$  140.75 (s), 140.37 (s), 137.50 (s), 136.63 (s), 135.45 (d, *J* = 10.5 Hz), 134.25 (d, *J* = 11.4 Hz), 133.81 (d, *J* = 10.3 Hz), 133.50 (d, *J* = 10.1 Hz), 132.30 (s), 131.81 (s), 131.44 (s), 130.07 (s), 129.94 (s), 129.76 (s), 128.48 (s), 128.35 (s), 128.23 (s), 128.10 (s), 127.99 (s), 125.34 (s), 120.78 (s), 48.73 (s, -CH(CH<sub>3</sub>)<sub>2</sub>), 23.81 (s, -CH(CH<sub>3</sub>)<sub>2</sub>), 23.55 (s, -CH(CH<sub>3</sub>)<sub>2</sub>). <sup>31</sup>P NMR (162 MHz, C<sub>6</sub>D<sub>6</sub>)  $\delta$  32.16 (d, *J* = 7.9 Hz), 20.86 (d, *J* = 9.1 Hz). MALDI-TOF-MS (m/z): calcd for C<sub>30</sub>H<sub>36</sub>NNiO<sub>2</sub>P<sub>2</sub>: 562.1575, found: 562.0959 [M-Cl-Ph+H<sub>3</sub>O]<sup>+</sup>. Anal. Calcd for C<sub>36</sub>H<sub>38</sub>ClNNiOP<sub>2</sub>: C, 65.83; H, 5.83; N, 2.13; Found: C, 65.46; H, 5.75; N, 2.15.

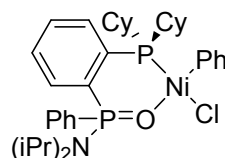

#### Ni2

Yield 75 % (0.496 g). Orange solid. <sup>31</sup>P NMR (162 MHz, CDCl<sub>3</sub>)  $\delta$  36.11 (d, *J* = 12.8 Hz), 14.08 (d, *J* = 13.2 Hz). MALDI-TOF-MS (m/z): calcd for C<sub>30</sub>H<sub>48</sub>NNiO<sub>2</sub>P<sub>2</sub>:

574.2514, found: 574.1851  $[M-Cl-Ph+H_3O]^+$ . Anal. Calcd for  $C_{36}H_{50}ClNNiOP_2$ : C, 64.64; H, 7.53; N, 2.09; Found: C, 64.41; H, 7.45; N, 2.25.

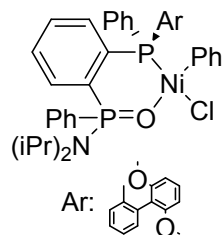

### Ni3

Yield 53 % (0.403 g). Yellow solid.  $^{31}P$  NMR (162 MHz,  $CDCl_3$ )  $\delta$  35.31 (s), 35.20 (s), 16.74 (s), 12.09 (s). MALDI-TOF-MS (m/z): calcd for  $C_{38}H_{44}NNiO_4P_2$ : 698.2099, found: 698.1234  $[M-Cl-Ph+H_3O]^+$ . Anal. Calcd for  $C_{44}H_{46}ClNNiO_3P_2$ : C, 66.65; H, 5.85; N, 1.77; Found: C, 66.96; H, 5.65; N, 1.65.

### 2.4 Standard Procedure for the Synthesis of Complex Ni1-Br

The mixture of ligand (1 mmol),  $DMENiBr_2$  (308 mg, 1 mmol) and  $CH_2Cl_2$  (20 mL) was stirred overnight at room temperature. During stirring, the color of the solution was changed from yellow to purple and some solid precipitated. The desired compound can be isolated from recrystallization from diethylether and dichloromethane. The pure compound was obtained as a purple solid.

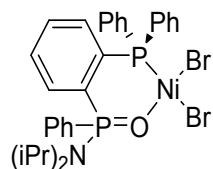

### Ni1-Br

Yield 85 % (0.600 g). Purple solid. MALDI-TOF-MS (m/z): calcd for  $C_{30}H_{33}BrNNiOP_2$ : 622.0574, found: 621.9866  $[M-Br]^+$ . Anal. Calcd for  $C_{30}H_{33}Br_2NNiOP_2$ : C, 51.18; H, 4.72; N, 1.99; Found: C, 51.24; H, 4.63; N, 2.05.

### 2.5 General in-Situ-Activated Polymerization Procedure.

Under an inert atmosphere, a 350 mL glass thick-walled pressure vessel was charged with NaBAF (1.2 equiv), 18 mL of toluene, and a magnetic stir bar. The bottle was sealed and placed in an oil bath at the desired temperature. The vessel was pressurized with ethylene and allowed to equilibrate under constant pressure for 10

minutes with stirring. 1  $\mu\text{mol}$  of nickel complex in 2 mL  $\text{CH}_2\text{Cl}_2$  was injected into the polymerization system via syringe and stirred continuously for the desired time. With rapid stirring, the reactor was pressurized and maintained at 9.0 atm of ethylene. The polymerization was quenched via the addition of MeOH (5 mL) and the polymer was precipitated using excess acidic MeOH (methanol/HCl =50/1) and dried at 60  $^\circ\text{C}$  for 24 h under vacuum.

## **2.6 Procedure for Copolymerization of Ethylene and Polar Monomer**

In a typical experiment, a 350 mL glass thick-walled pressure vessel was charged with NaBAF (1.2 equiv), desired amount of toluene, polar monomer and a magnetic stir bar in the glovebox. The pressure vessel was connected to a high pressure line and the solution was degassed. The vessel was warmed to desired temperature using an oil bath and allowed to equilibrate for 5min. 20  $\mu\text{mol}$  of Ni complex in 2 mL  $\text{CH}_2\text{Cl}_2$  was injected into the polymerization system via syringe. With rapid stirring, the reactor was pressurized and maintained at desired pressure of ethylene. After a desired amount of polymerization time, the pressure vessel was vented and the polymer was precipitated in methanol and dried at 60  $^\circ\text{C}$  for 24 h under vacuum, The polar monomer incorporation (mol %) was calculated from  $^1\text{H}$  NMR analysis.

## **2.7 Procedure for $\alpha$ -olefin polymerization by nickel complexes.**

In a typical experiment, a 20 mL glass tube was charged with the required amount of NaBAF (1.2 eq) and a magnetic stirrer bar in the glovebox. Then toluene and  $\alpha$ -olefin (8 mL) was added into the tube. The tube was warmed to 30  $^\circ\text{C}$  by using an oil bath with rapid stirring and allowed to equilibrate for 5 min. The nickel complex (3  $\mu\text{mol}$ ) in  $\text{CH}_2\text{Cl}_2$  (2 mL) was injected into the tube with a syringe. After 12 h, the methanol was decanted off, and the sticky polymer was redissolved in toluene. The polymer solution was filtered through alumina or silica to remove catalyst residues. After evaporation, the resulting polymer was collected and dried under vacuum at 40  $^\circ\text{C}$  to a constant weight..



### 3. NMR-Spectra Data

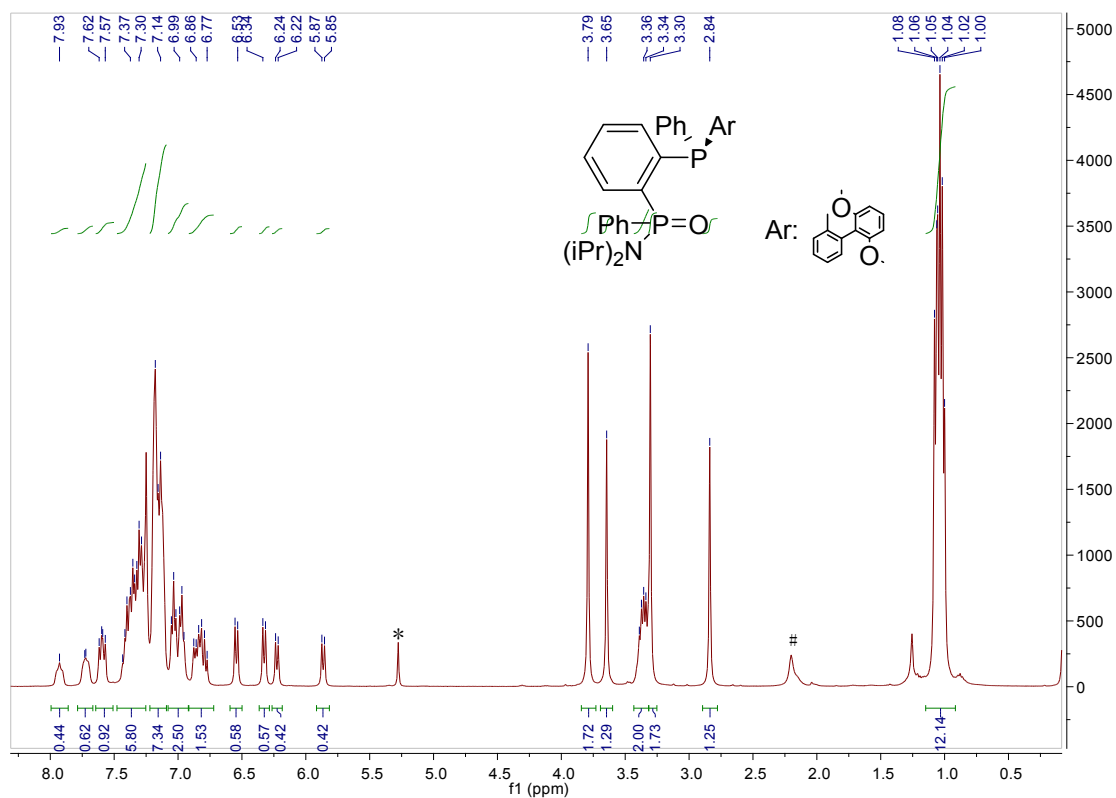

**Figure S3.** <sup>1</sup>H NMR spectrum of L3 in CDCl<sub>3</sub> (\* is DCM, # is impurity).

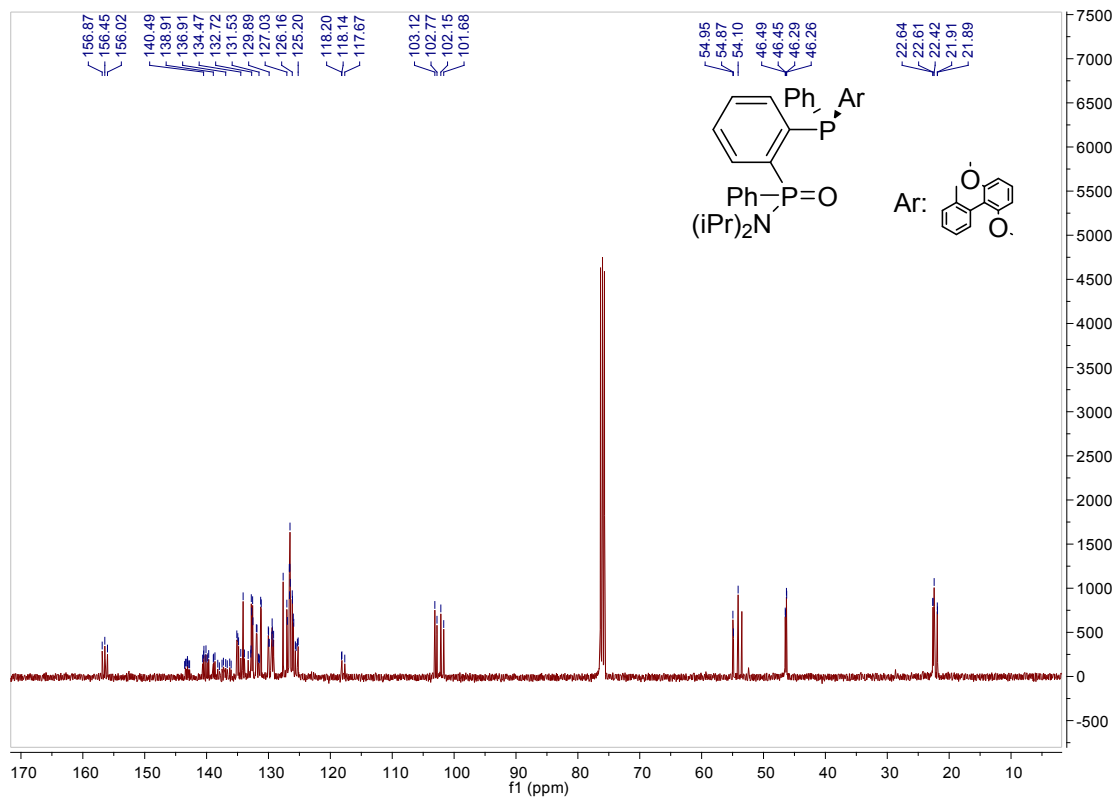

**Figure S4.** <sup>13</sup>C NMR spectrum of L3 in CDCl<sub>3</sub>.

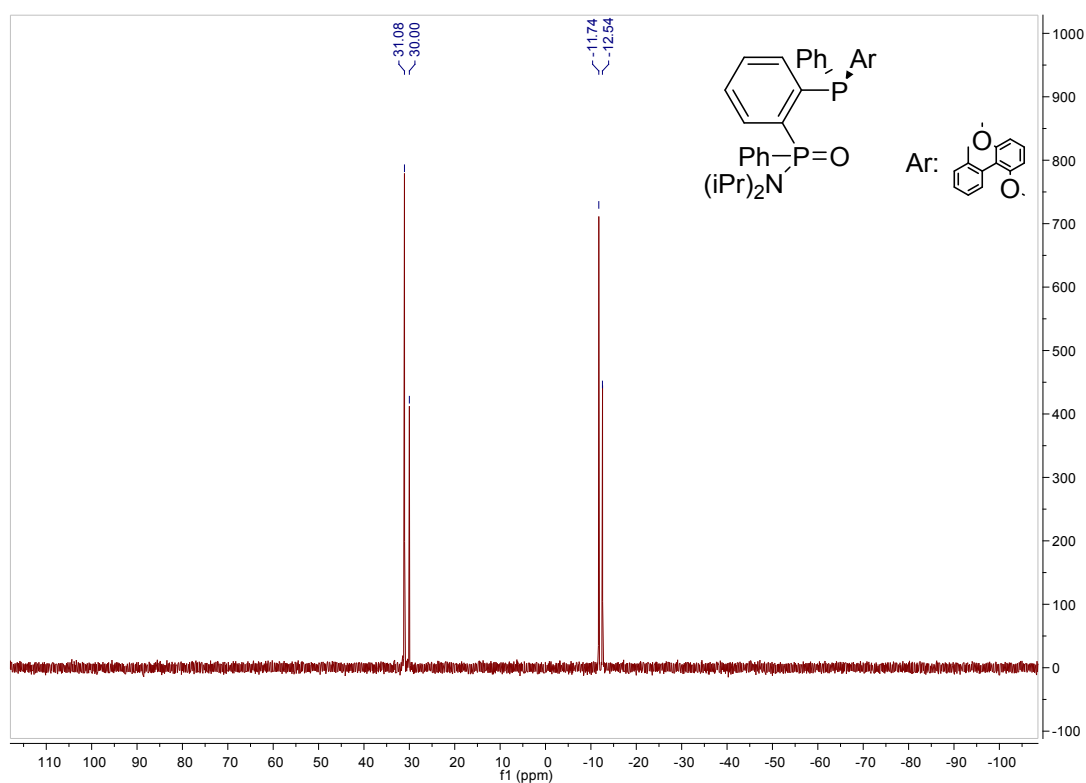

**Figure S5.** <sup>31</sup>P NMR spectrum of **L3** in CDCl<sub>3</sub>.

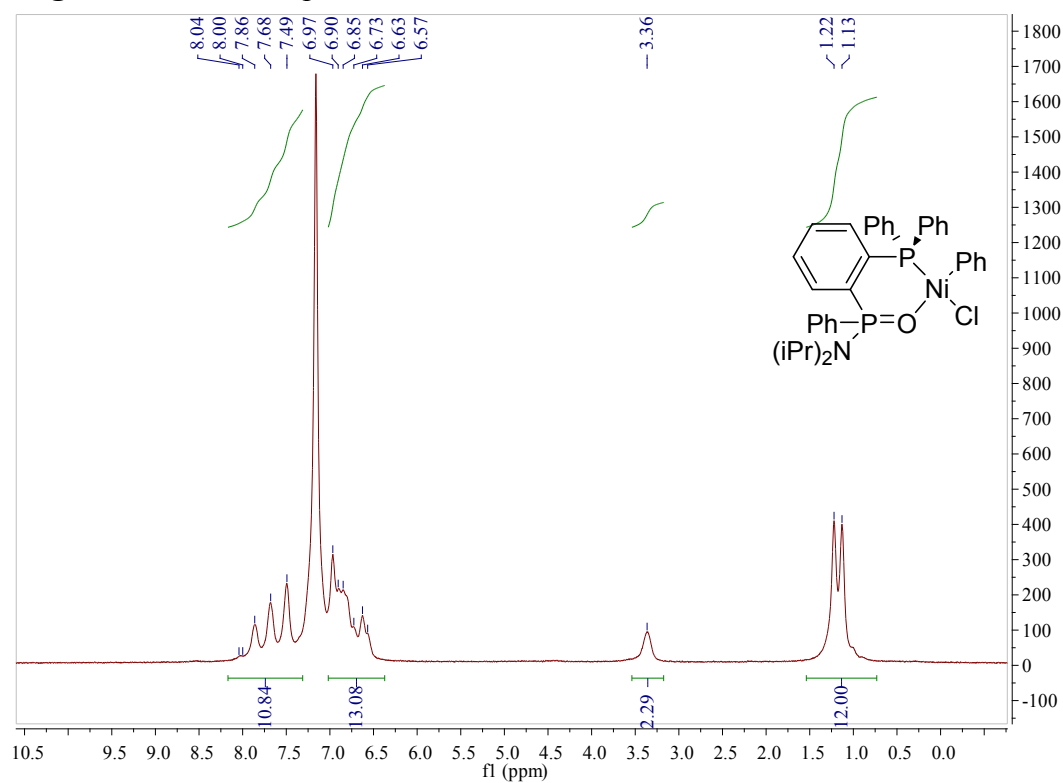

**Figure S6.** <sup>1</sup>H NMR spectrum of **Ni1** in C<sub>6</sub>D<sub>6</sub>.

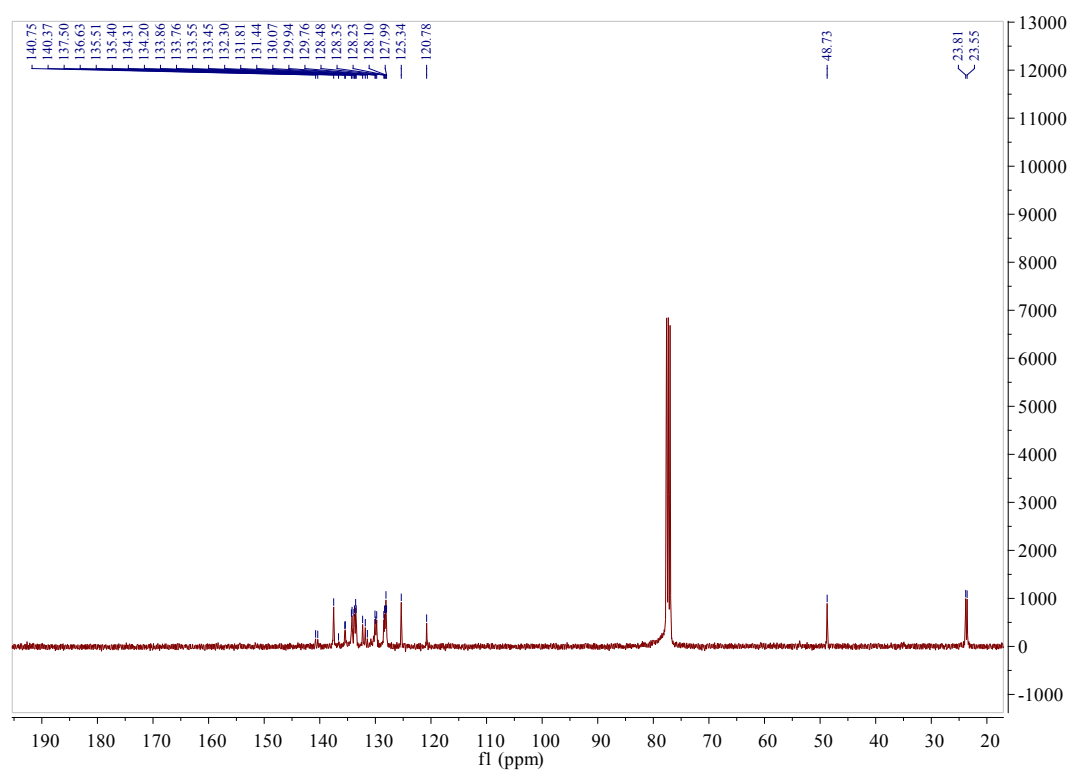

**Figure S7.**  $^{13}\text{C}$  NMR spectrum of **Ni1** in  $\text{CDCl}_3$ .

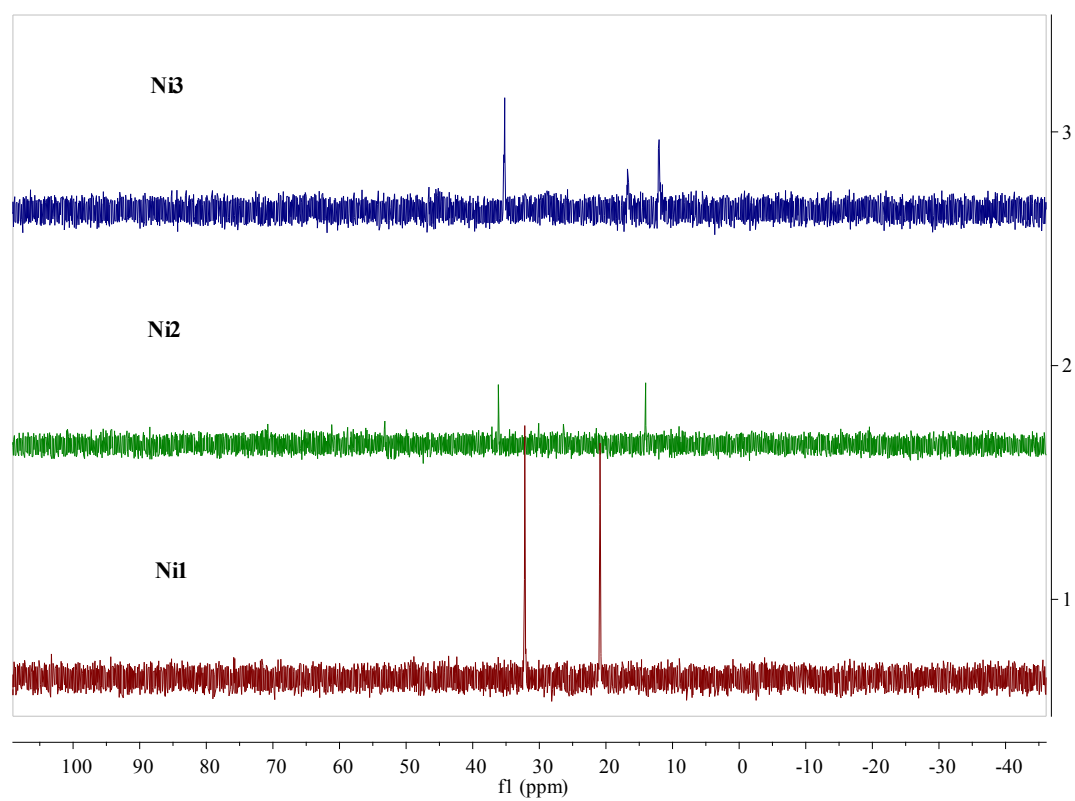

**Figure S8.**  $^{31}\text{P}$  NMR spectrum of **Ni1** in  $\text{C}_6\text{D}_6$ , **Ni2** and **Ni3** in  $\text{CDCl}_3$ .

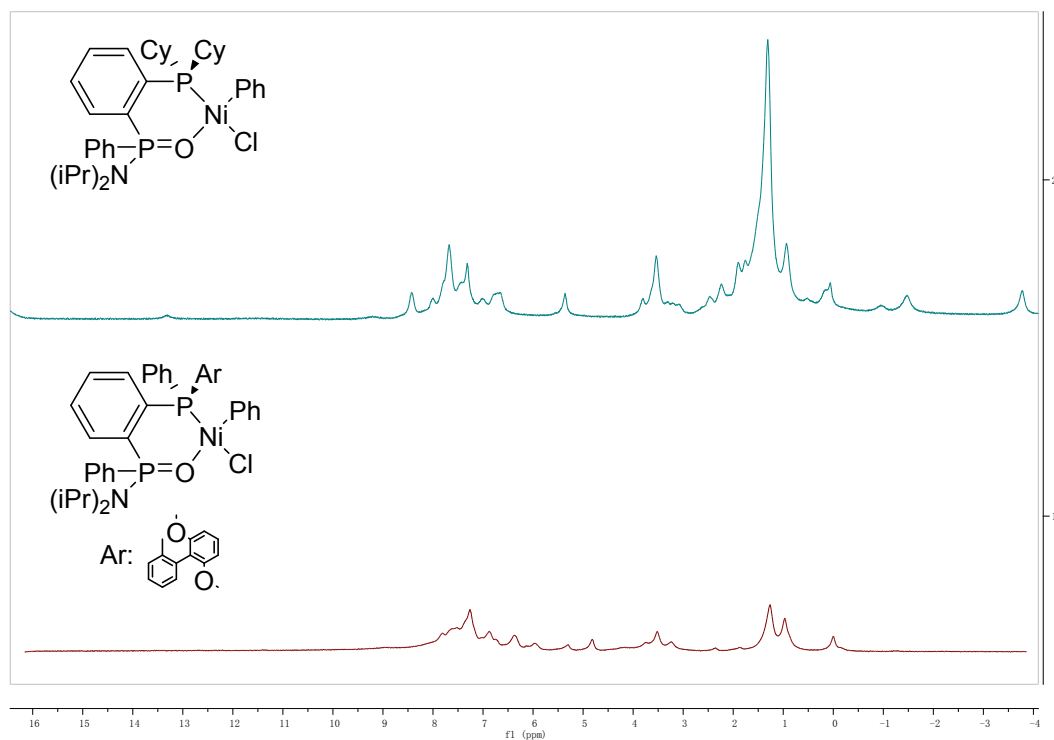

**Figure S9.**  $^1\text{H}$  NMR spectrum of **Ni2** and **Ni3** in  $\text{CDCl}_3$ .

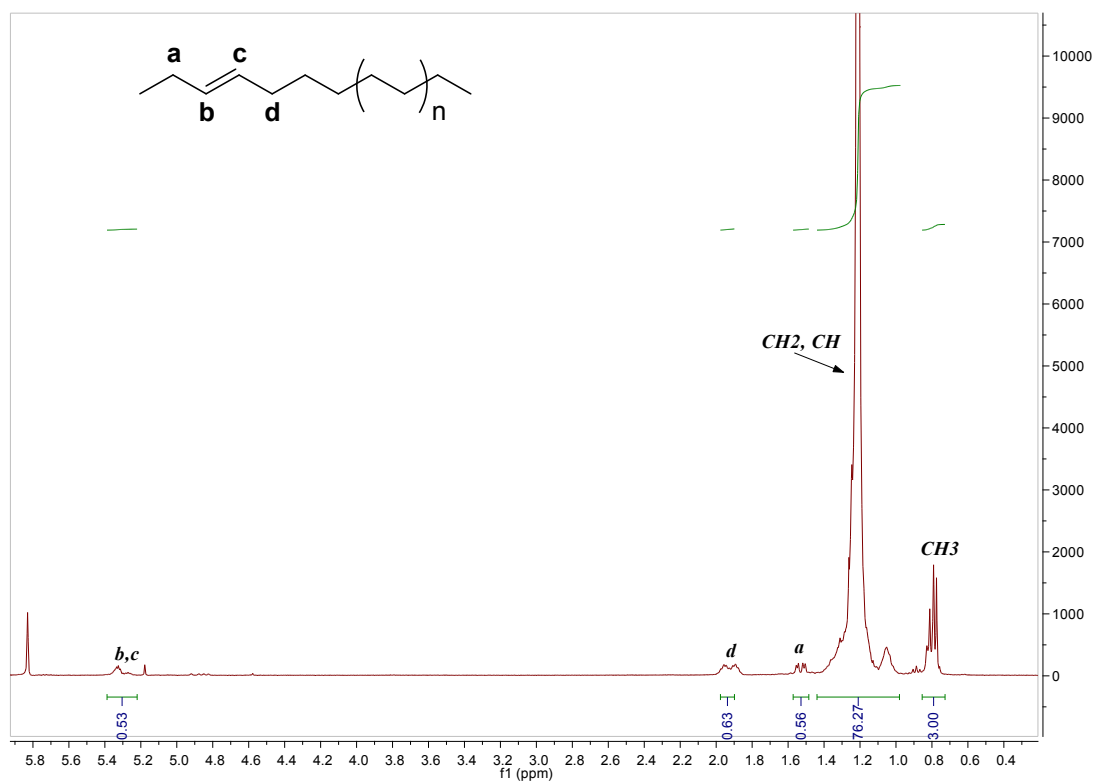

**Figure S10.**  $^1\text{H}$  NMR spectrum of the polyethylene generated by complex **Ni3** from table 1, entry 5. (in  $\text{CDCl}_2\text{CDCl}_2$  at  $120^\circ\text{C}$ ).

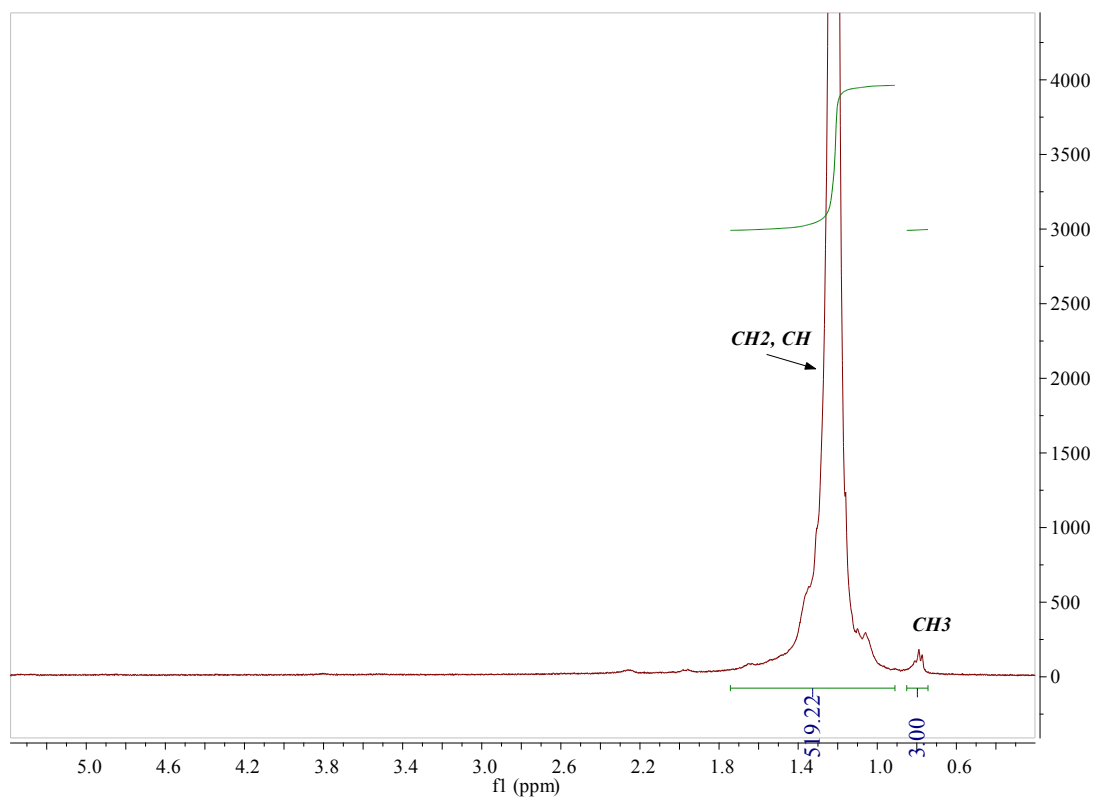

**Figure S11.** <sup>1</sup>H NMR spectrum of the polyethylene generated by complex **Ni3** from table 1, entry 6. (in CDCl<sub>2</sub>CDCl<sub>2</sub> at 120 °C).

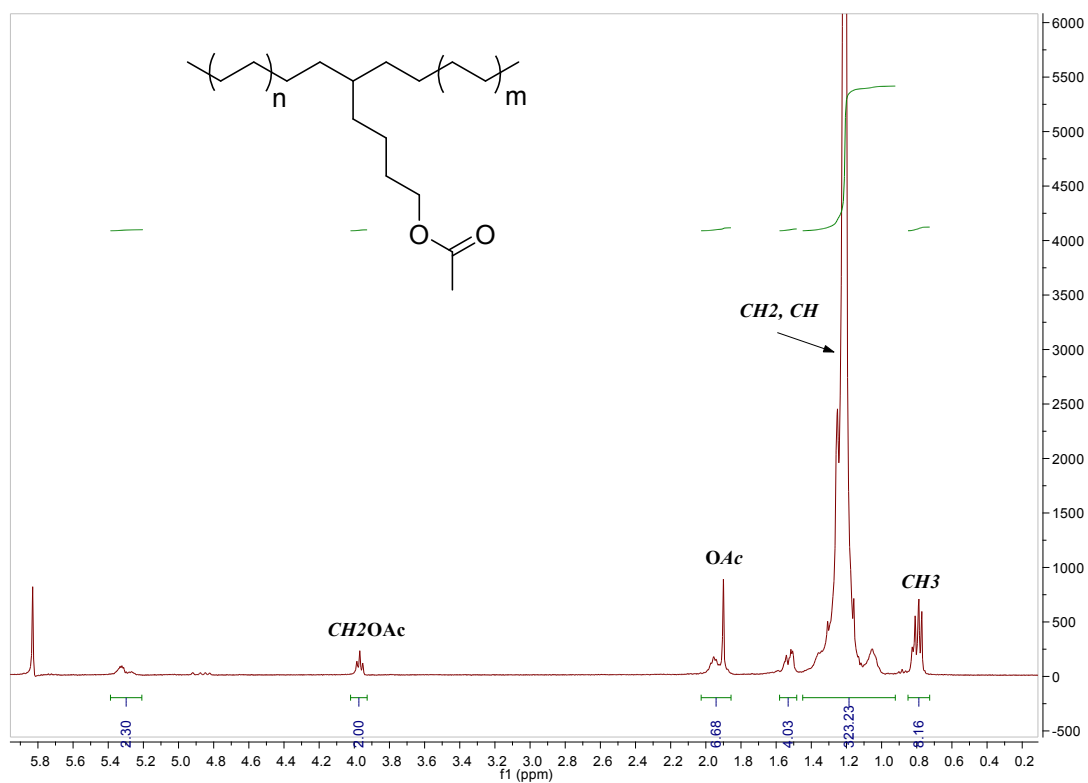

**Figure S12.** <sup>1</sup>H NMR spectrum of the copolymer generated by complex **Ni3** from table 2, entry 9. (in CDCl<sub>2</sub>CDCl<sub>2</sub> at 120 °C).

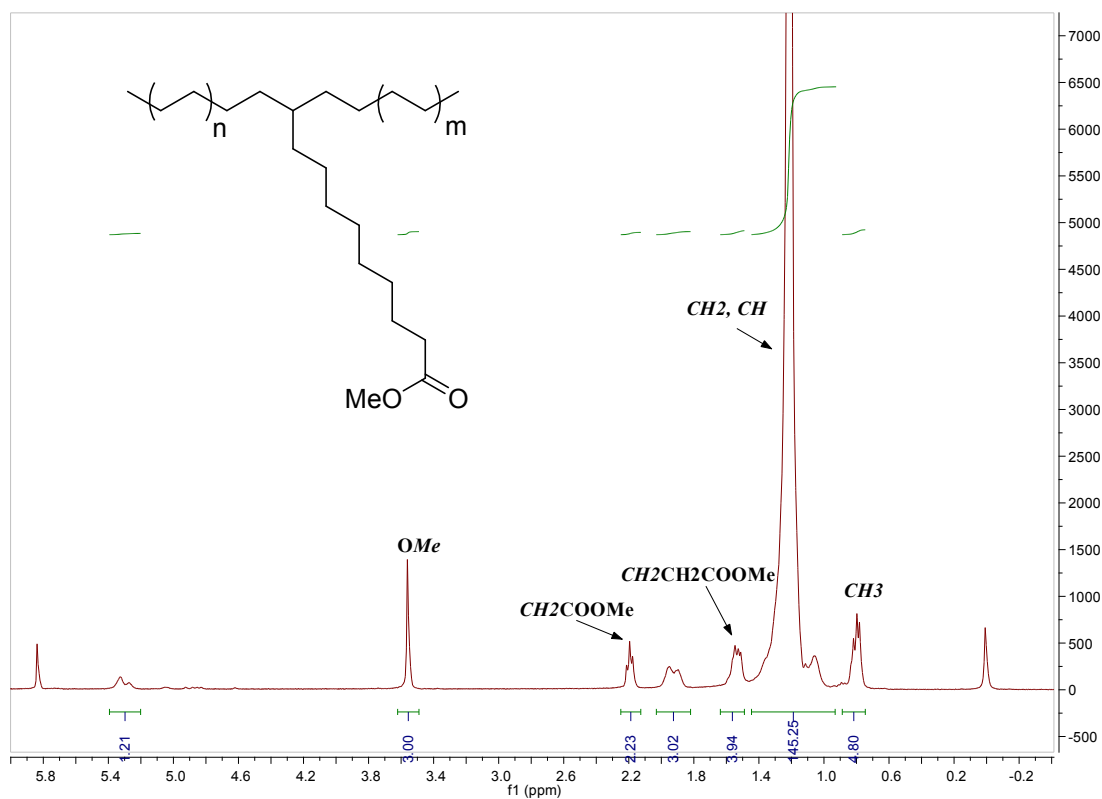

**Figure S13.**  $^1\text{H}$  NMR spectrum of the copolymer generated by complex **Ni3** from table 2, entry 4. (in  $\text{CDCl}_2\text{CDCl}_2$  at  $120^\circ\text{C}$ ).

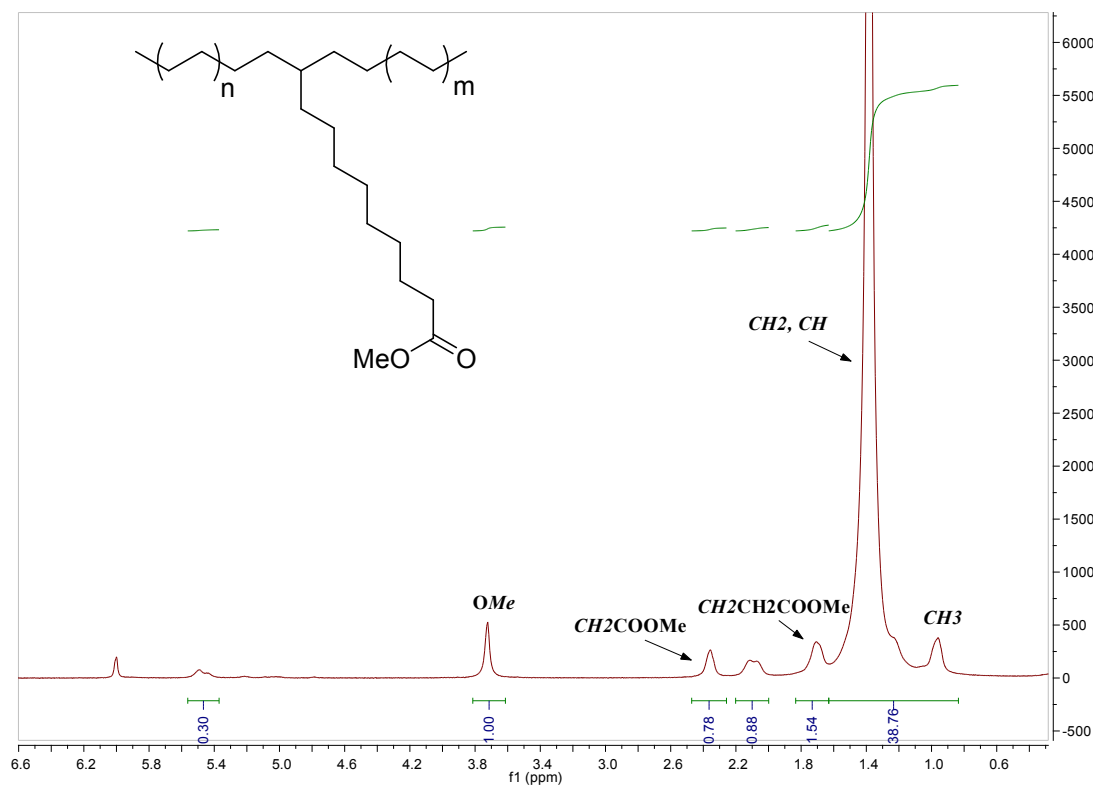

**Figure S14.**  $^1\text{H}$  NMR spectrum of the copolymer generated by complex **Ni3** from table 2, entry 5. (in  $\text{CDCl}_2\text{CDCl}_2$  at  $120^\circ\text{C}$ ).

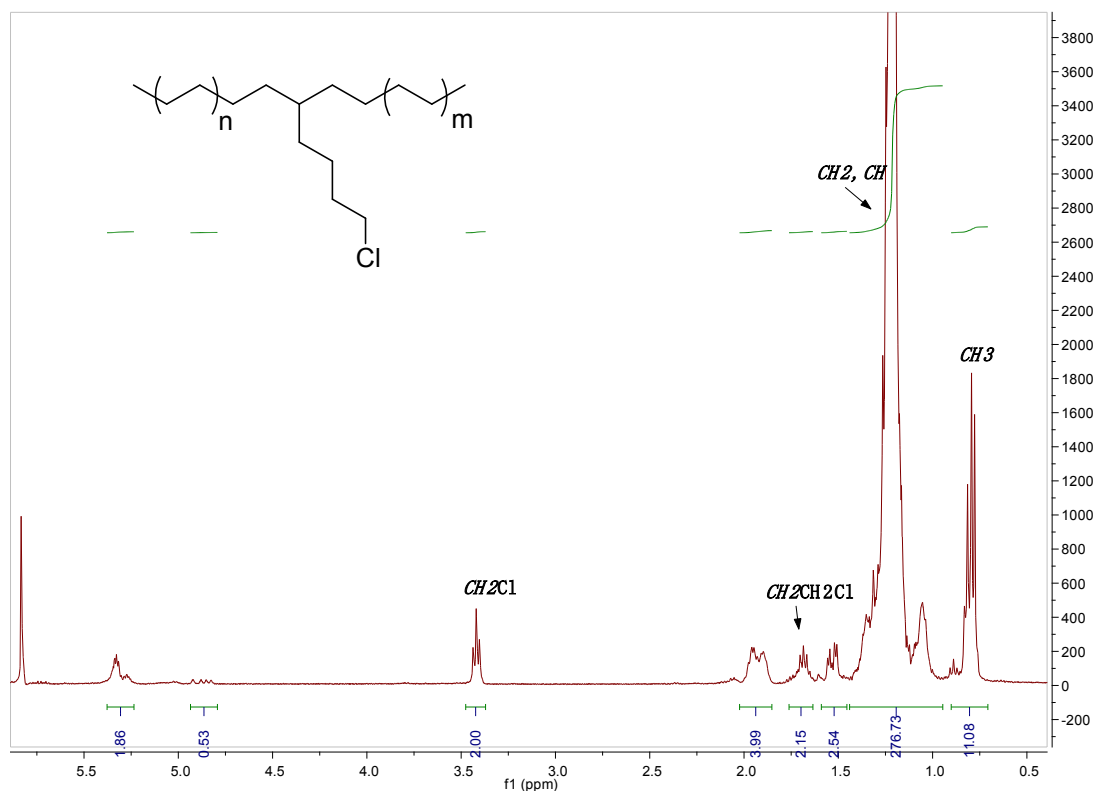

**Figure S15.**  $^1\text{H}$  NMR spectrum of the copolymer generated by complex **Ni3** from table 2, entry 6. (in  $\text{CDCl}_2\text{CDCl}_2$  at  $120\text{ }^\circ\text{C}$ ).

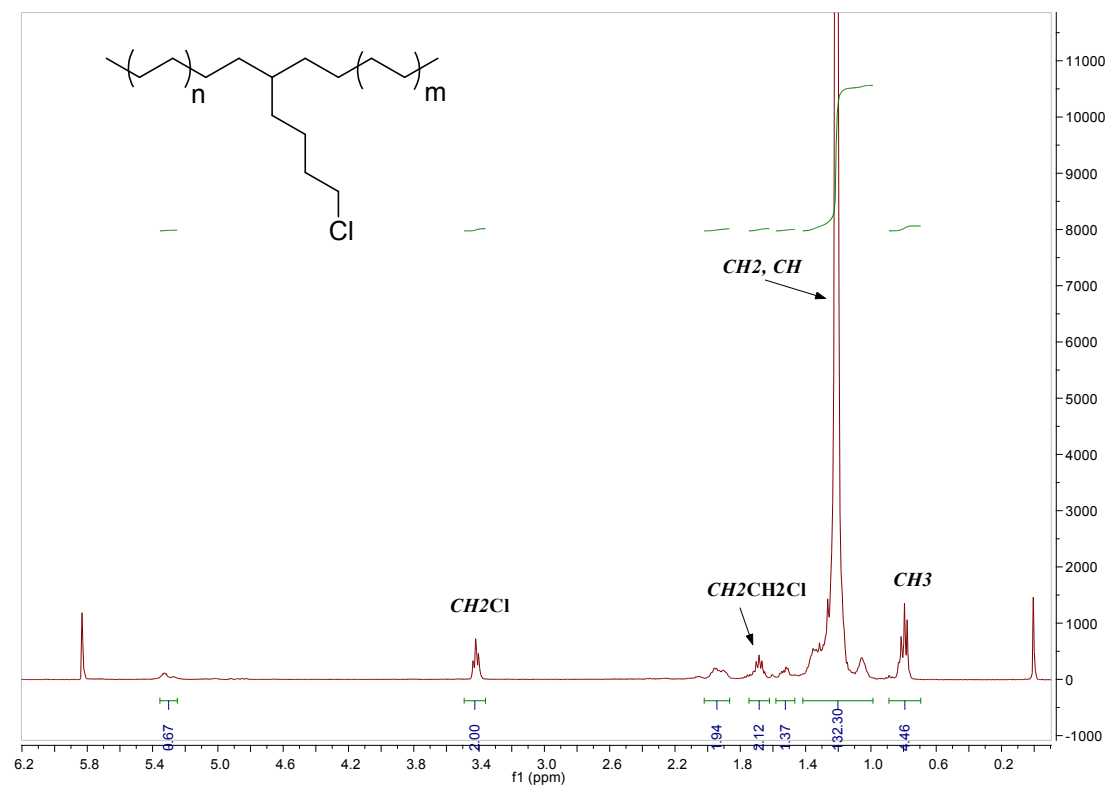

**Figure S16.**  $^1\text{H}$  NMR spectrum of the copolymer generated by complex **Ni3** from table 2, entry 7. (in  $\text{CDCl}_2\text{CDCl}_2$  at  $120\text{ }^\circ\text{C}$ ).

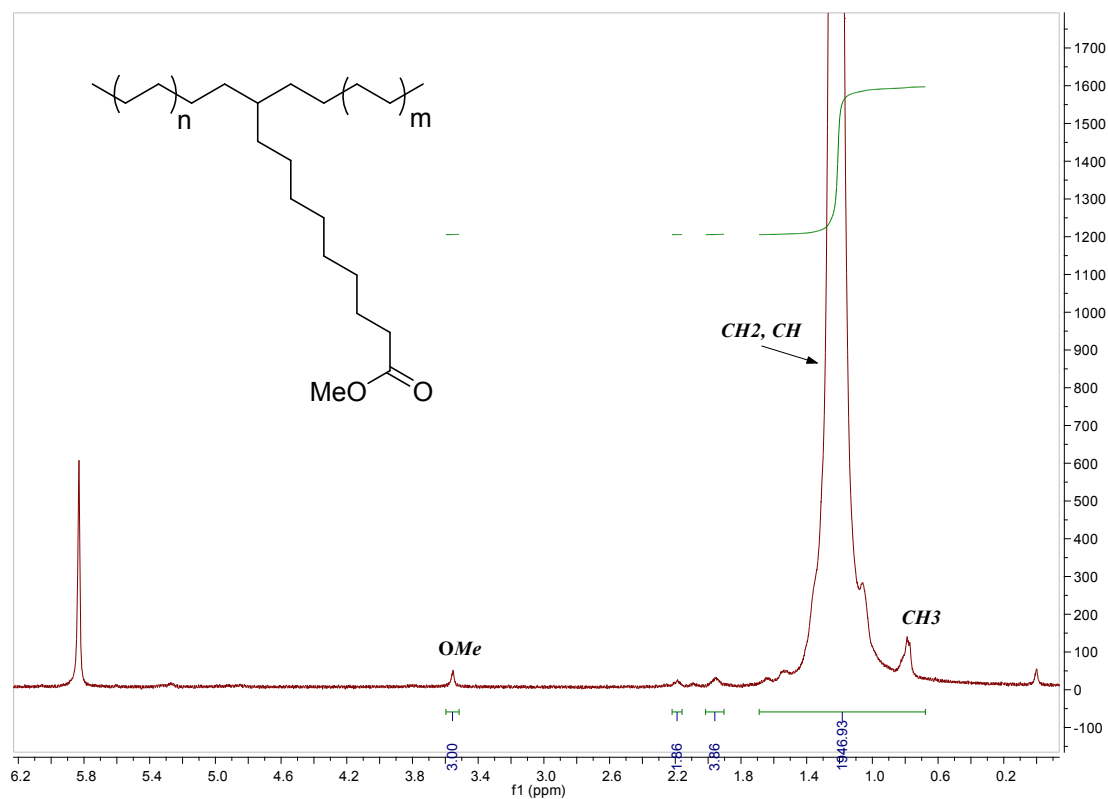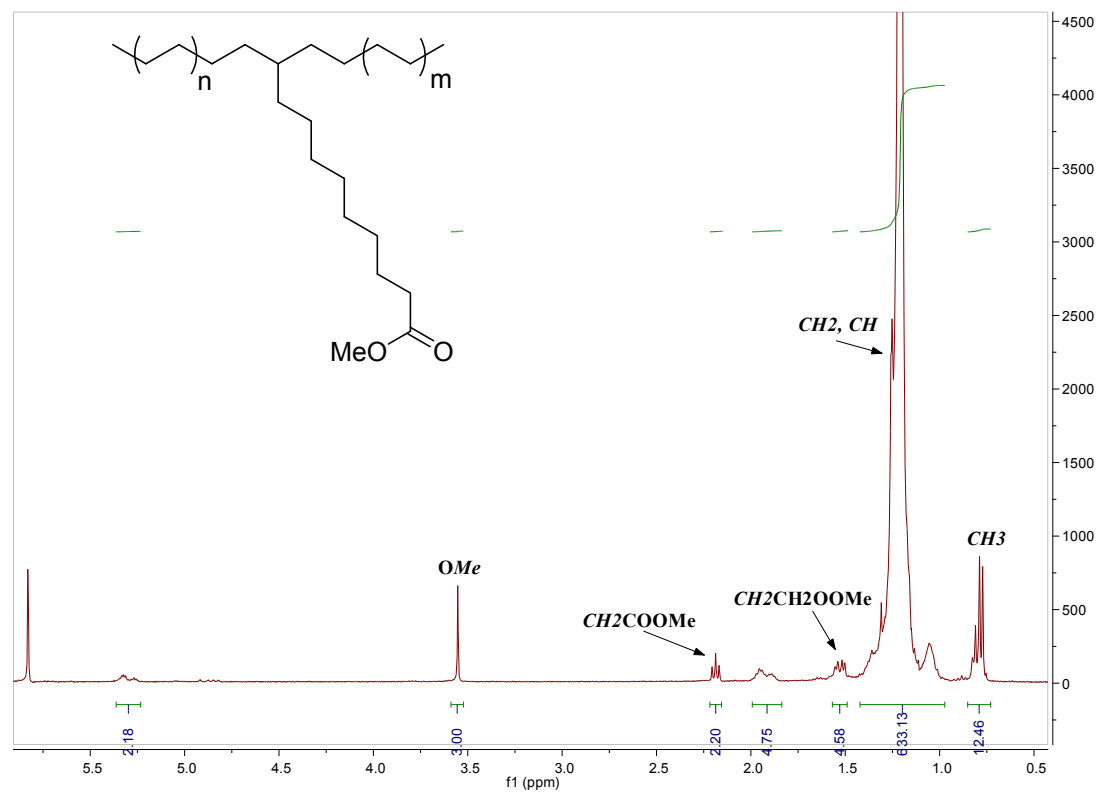



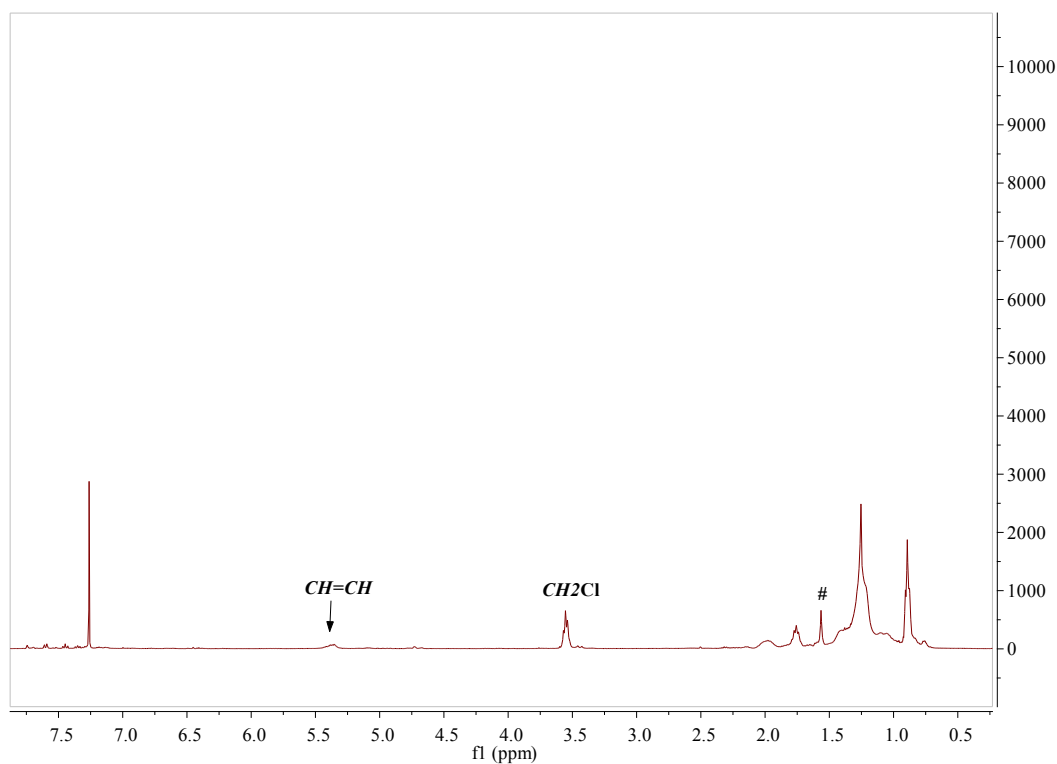

**Figure S19.**  $^1\text{H}$  NMR spectrum of the oligomer generated by **Ni2** from table 3, entry 4. (in  $\text{CDCl}_3$ , #:  $\text{H}_2\text{O}$ ).

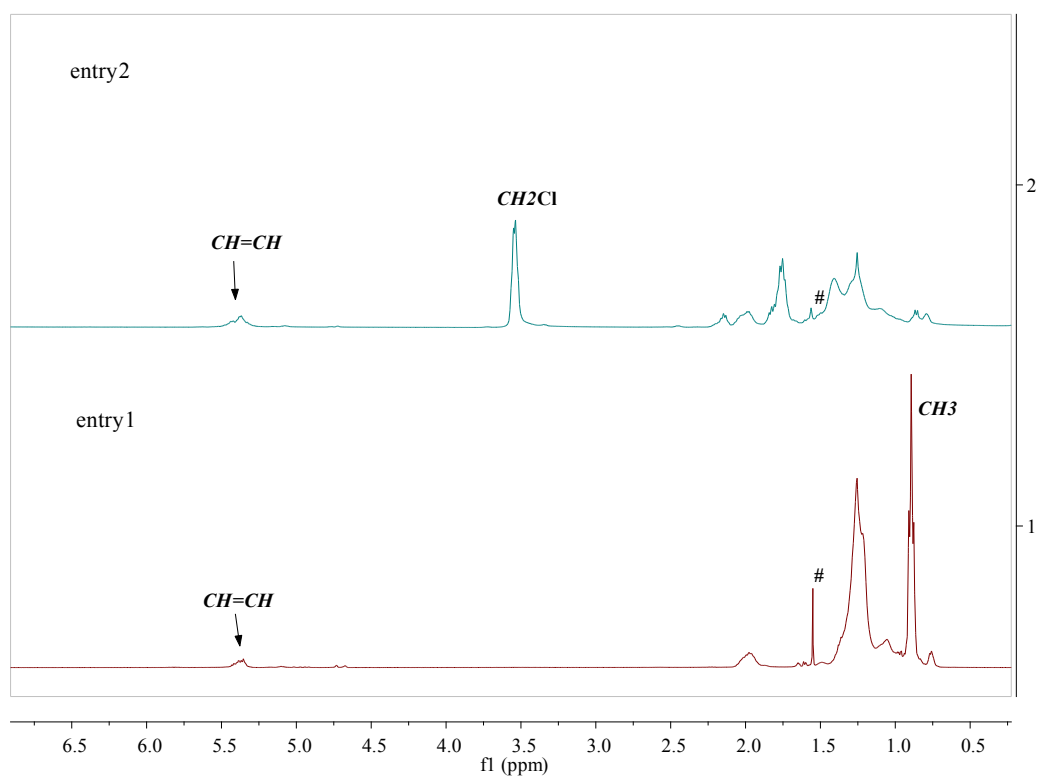

**Figure S20.**  $^1\text{H}$  NMR spectrum of the oligomer generated by **Ni1** from table 3, entry 1 and entry 2. (in  $\text{CDCl}_3$ , #:  $\text{H}_2\text{O}$ ).

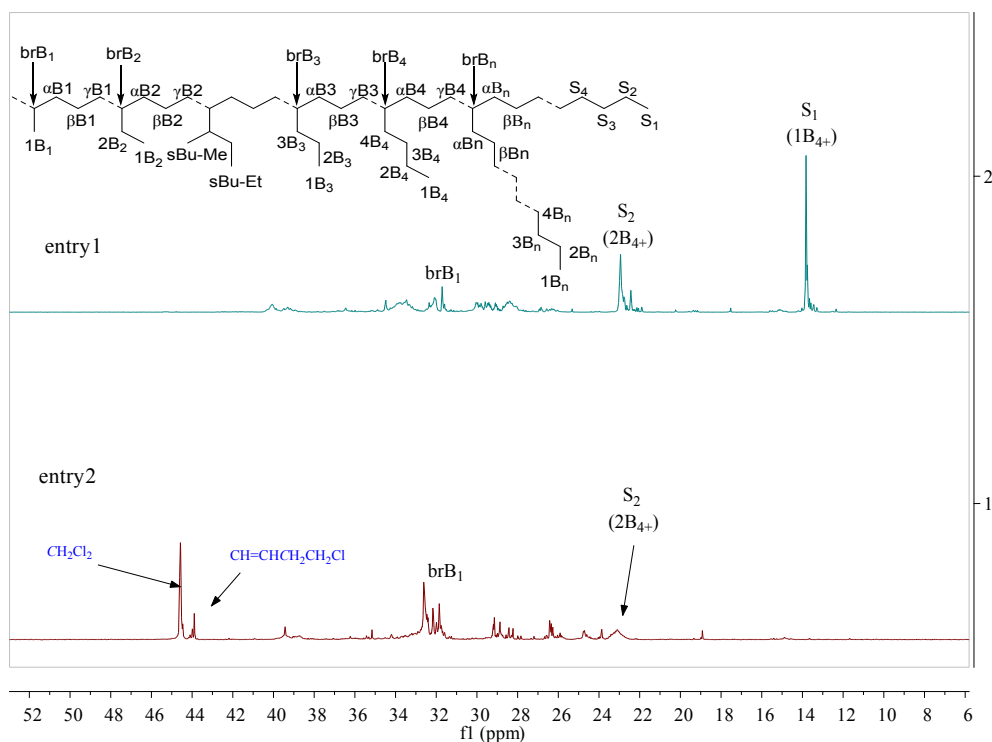

**Figure S21.**  $^{13}\text{C}$  NMR spectrum of the oligomer generated by **Ni1** from table 3, entry 1 and entry 2. (in  $\text{CDCl}_3$ ).

#### 4. DSC and GPC of polymers

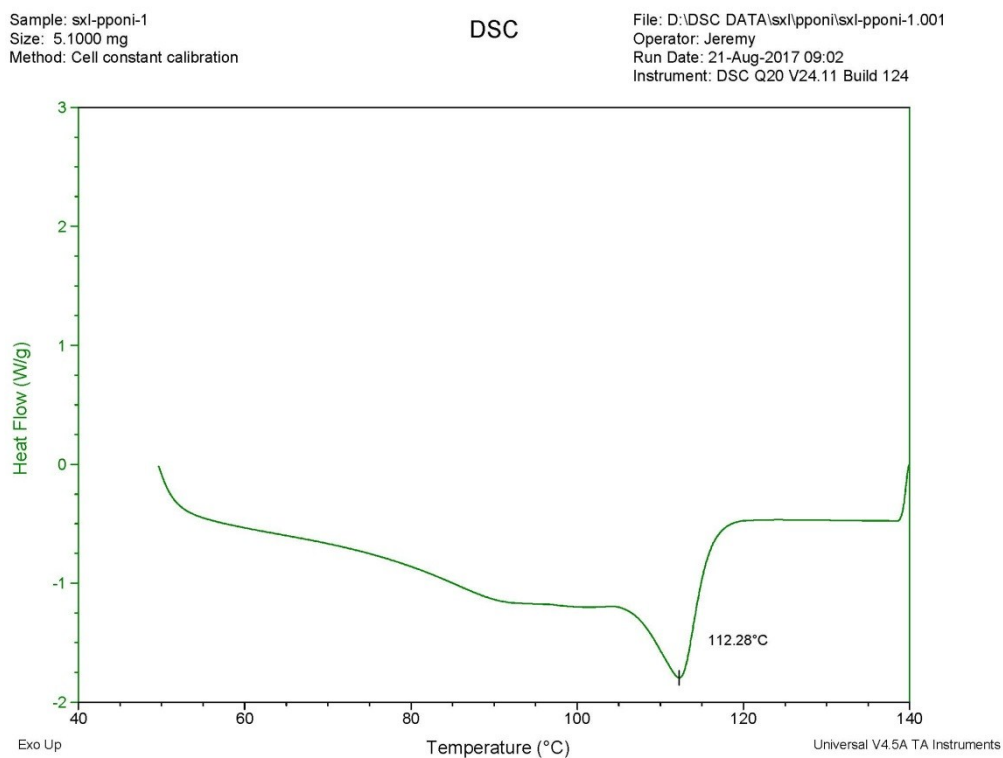

**Figure S22.** DSC of the polymer from table 1, entry 1.

Sample: sxl-pponi-2  
Size: 5.3000 mg  
Method: Cell constant calibration

DSC

File: D:\DSC DATA\sxl\pponi\sxl-pponi-2.001  
Operator: Jeremy  
Run Date: 21-Aug-2017 10:00  
Instrument: DSC Q20 V24.11 Build 124

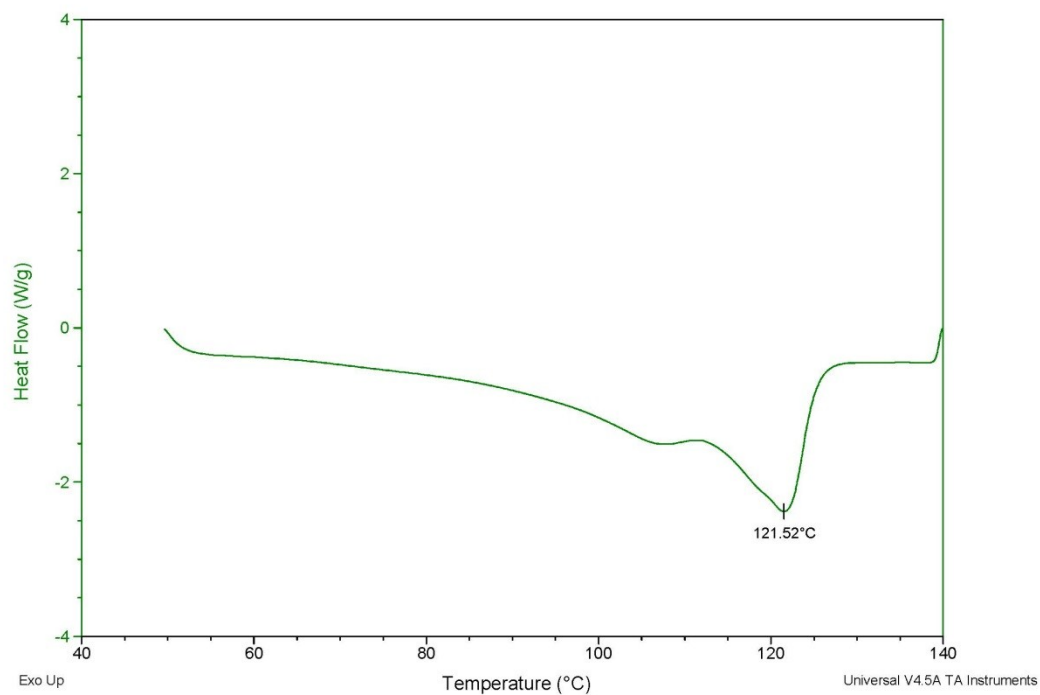

**Figure S23.** DSC of the polymer from table 1, entry 5.

Sample: sxl-pponi-6  
Size: 5.1000 mg  
Method: Cell constant calibration

DSC

File: D:\DSC DATA\sxl\pponi\sxl-pponi-6.001  
Operator: Jeremy  
Run Date: 21-Aug-2017 18:36  
Instrument: DSC Q20 V24.11 Build 124

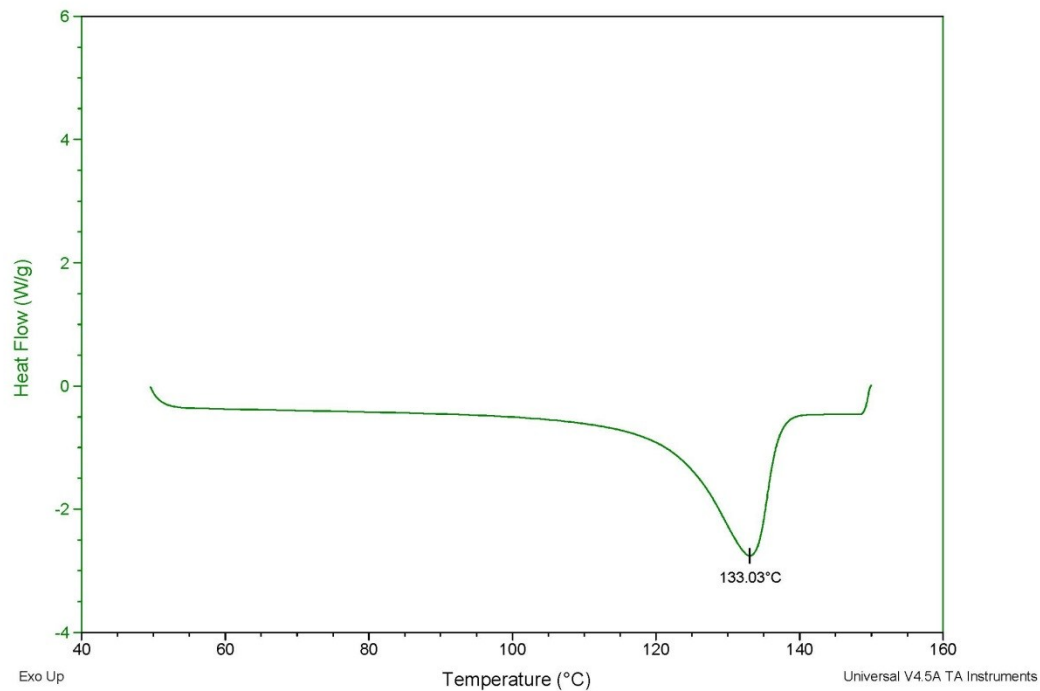

**Figure S24.** DSC of the polymer from table 1, entry 6.

Sample: sxl-pponi-8  
Size: 4.9000 mg  
Method: Cell constant calibration

DSC

File: E:\ \pponi\sxl-pponi-8.001  
Operator: Jeremy  
Run Date: 22-Aug-2017 10:39  
Instrument: DSC Q20 V24.11 Build 124

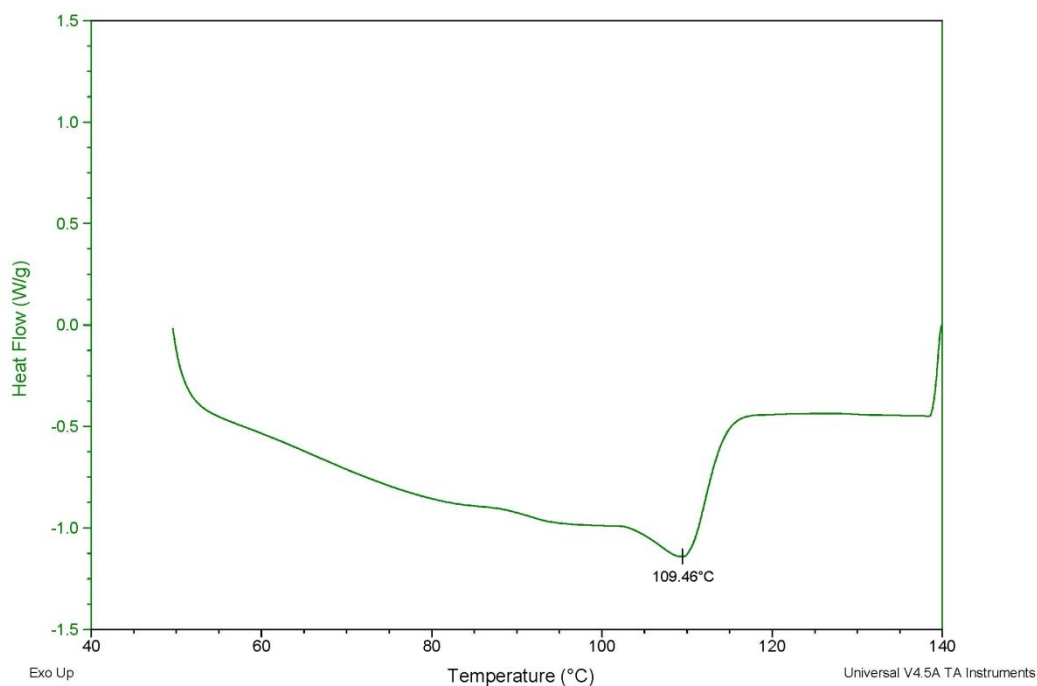

**Figure S25.** DSC of the copolymer from table 2, entry 2.

Sample: sxl-pponi-10  
Size: 5.0000 mg  
Method: Cell constant calibration

DSC

File: E:\ \pponi\sxl-pponi-10.001  
Operator: Jeremy  
Run Date: 22-Aug-2017 16:34  
Instrument: DSC Q20 V24.11 Build 124

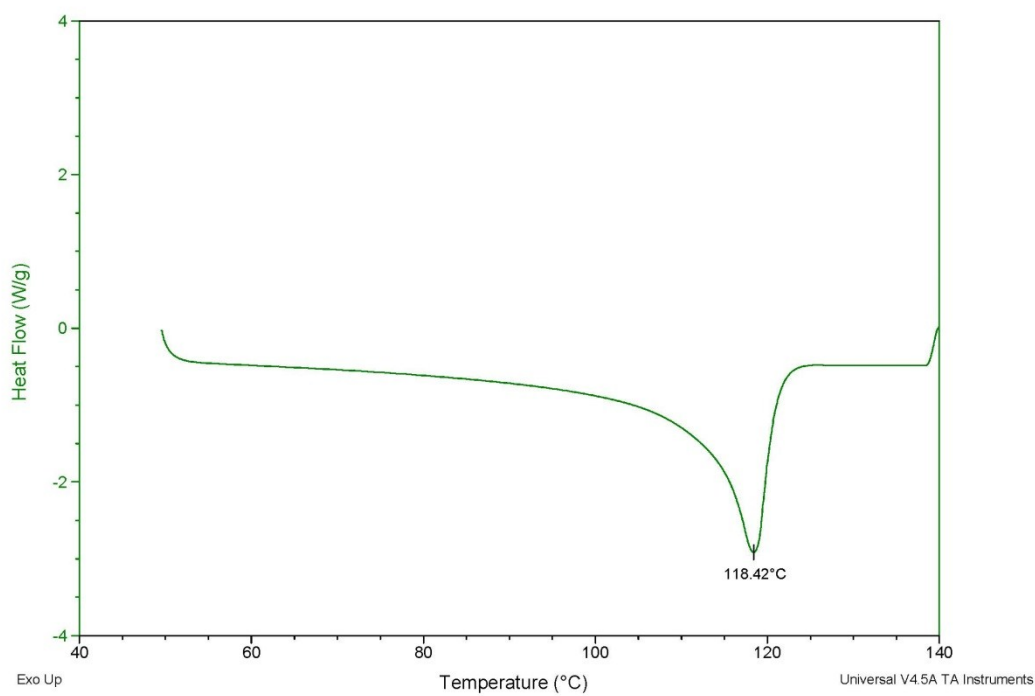

**Figure S26.** DSC of the copolymer from table 2, entry 3.

Sample: sxl-pponi-16  
Size: 5.0000 mg  
Method: Cell constant calibration

DSC

File: E:\pponi\sxl-pponi-16.001  
Operator: Jeremy  
Run Date: 23-Aug-2017 17:23  
Instrument: DSC Q20 V24.11 Build 124

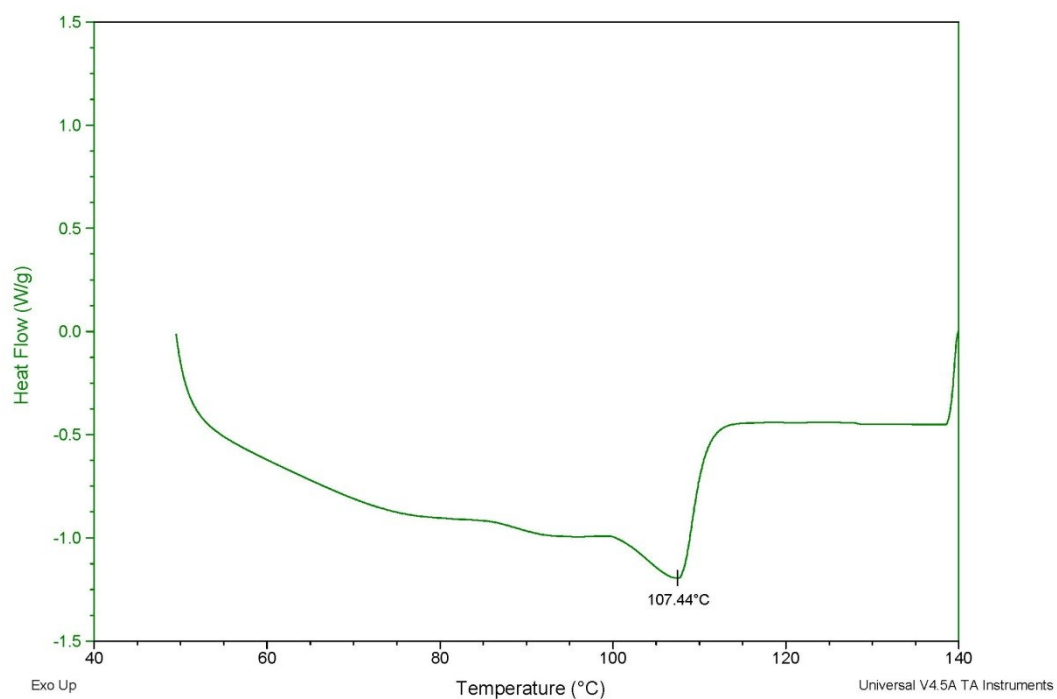

**Figure S27.** DSC of the copolymer from table 2, entry 8.

## Cirrus GPC Sample Injection Report

Generated by: HTGPC

Thursday, October 26, 2017 9:04 AM

Workbook: E:\Cirrus Workbooks\20161130\20161130.plw

### Sample Details

Sample Name: S-8

Acquired: 10/20/2017 1:21:33 PM

By Analyst: HTGPC

Batch Name: SXL

Concentration: 0.10

Injection Volume: 200.0 ul K of Sample: 14.1000

Alpha of Sample:

Analysis Using Method: PS2016113001

0.7000

Calibration Used: 8/12/2017 3:25:40 PM

Calibration Type: Narrow Standard Curve Fit Used: 1

K: 14.1000

Alpha: 0.7000

Calibration Curve:  $y = 13.269036 - 0.643042x^{*1}$

High Limit MW RT: 10.27 mins

Low Limit MW RT: 16.37 mins

Flow Marker RT: 0.00 mins

FRCF: 1.0000

FRM Name:

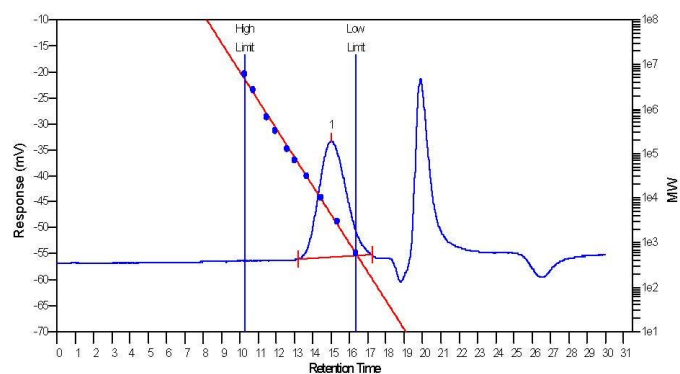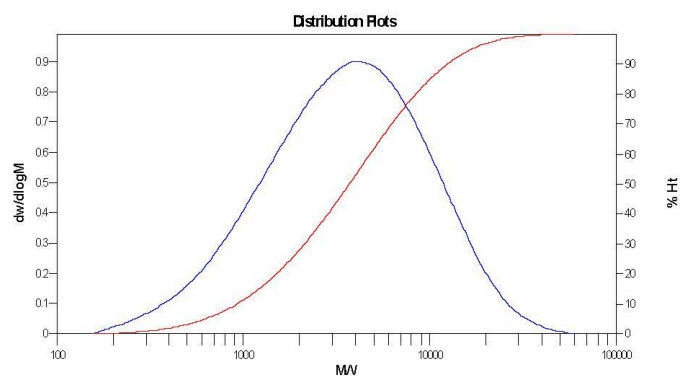

### MW Averages

| Peak No | Mp   | Mn   | Mw   | Mz    | Mz+1  | Mv   | PD      |
|---------|------|------|------|-------|-------|------|---------|
| 1       | 4099 | 2086 | 5473 | 11235 | 18243 | 4827 | 2.62368 |

### Processed Peaks

| Peak No | Name | Start RT (mins) | Max RT (mins) | End RT (mins) | Pk Height (mV) | % Height | Area (mV.secs) | % Area |
|---------|------|-----------------|---------------|---------------|----------------|----------|----------------|--------|
| 1       |      | 13.22           | 15.02         | 17.22         | 22.3146        | 0        | 2312.79        | 100    |

**Figure S28.** GPC of the polyethylene generated by complex **Ni1** from table 1, entry 2.

## Cirrus GPC Sample Injection Report

Generated by: HTGPC

Thursday, October 26, 2017 9:04 AM

Workbook: E:\Cirrus Workbooks\20161130\20161130.plw

### Sample Details

Sample Name: S-9

Acquired: 10/20/2017 1:56:36 PM

By Analyst: HTGPC

Batch Name: SXL

Concentration: 0.10

Injection Volume: 200.0 ul K of Sample: 14.1000

Alpha of Sample:

Analysis Using Method: PS2016113001

0.7000

### Calibration Used: 8/12/2017 3:25:40 PM

Calibration Type: Narrow Standard Curve Fit Used: 1

K: 14.1000

Alpha: 0.7000

Calibration Curve:  $y = 13.269036 - 0.643042x^{*1}$

High Limit MW RT: 10.27 mins

Low Limit MW RT: 16.37 mins

Flow Marker RT: 0.00 mins

FRCF: 1.0000

FRM Name:

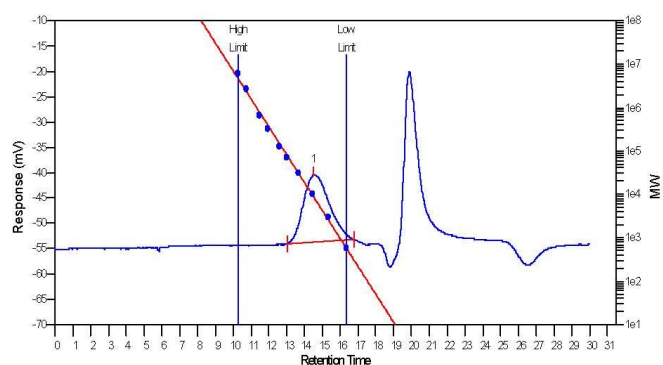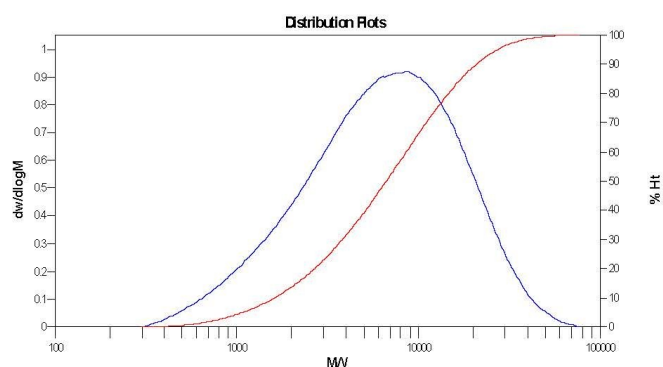

### MW Averages

| Peak No | Mp   | Mn   | Mw   | Mz    | Mz+1  | Mv   | PD      |
|---------|------|------|------|-------|-------|------|---------|
| 1       | 8594 | 3705 | 9300 | 17521 | 26350 | 8298 | 2.51012 |

### Processed Peaks

| Peak No | Name | Start RT (mins) | Max RT (mins) | End RT (mins) | Pk Height (mV) | % Height | Area (mV.secs) | % Area |
|---------|------|-----------------|---------------|---------------|----------------|----------|----------------|--------|
| 1       |      | 13.03           | 14.52         | 16.78         | 13.1702        | 0        | 1338.63        | 100    |

**Figure S29.** GPC of the polyethylene generated by complex **Ni2** from table 1, entry 4.

## Cirrus GPC Sample Injection Report

Generated by: HTGPC

Thursday, October 26, 2017 9:08 AM

Workbook: E:\Cirrus Workbooks\20161130\20161130.plw

### Sample Details

Sample Name: S-18

Acquired: 10/20/2017 6:54:27 PM

By Analyst: HTGPC

Batch Name: SXL

Concentration: 0.10

Injection Volume: 200.0 ul K of Sample: 14.1000

Alpha of Sample:

Analysis Using Method: PS2016113001

0.7000

### Calibration Used: 8/12/2017 3:25:40 PM

Calibration Type: Narrow Standard Curve Fit Used: 1

K: 14.1000

Alpha: 0.7000

Calibration Curve:  $y = 13.269036 - 0.643042x^{\wedge}1$

High Limit MW RT: 10.27 mins

Low Limit MW RT: 16.37 mins

Flow Marker RT: 0.00 mins FRCF: 1.0000

FRM Name:

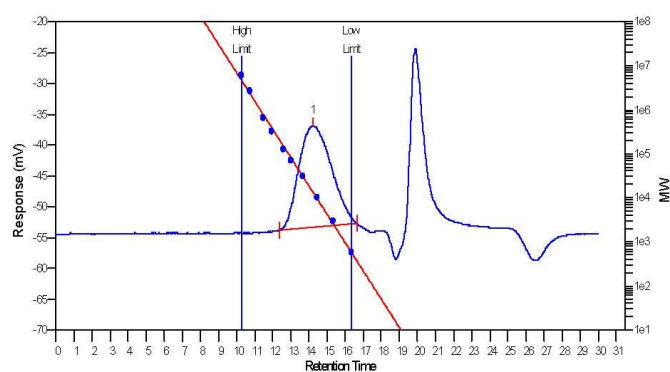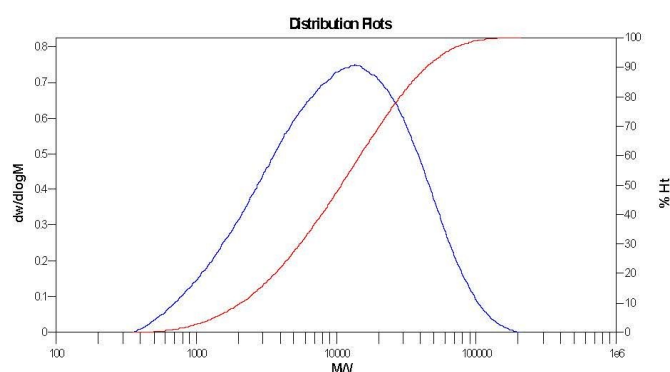

### MW Averages

| Peak No | Mp    | Mn   | Mw    | Mz    | Mz+1  | Mv    | PD      |
|---------|-------|------|-------|-------|-------|-------|---------|
| 1       | 13735 | 5105 | 18052 | 41840 | 67782 | 15420 | 3.53614 |

### Processed Peaks

| Peak No | Name | Start RT (mins) | Max RT (mins) | End RT (mins) | Pk Height (mV) | % Height | Area (mV.secs) | % Area |
|---------|------|-----------------|---------------|---------------|----------------|----------|----------------|--------|
| 1       |      | 12.37           | 14.20         | 16.67         | 16.5894        | 0        | 2068.61        | 100    |

**Figure S30.** GPC of the copolymer generated by complex **Ni3** from table 2, entry 3.



## Cirrus GPC Sample Injection Report

Generated by: HTGPC

Thursday, October 26, 2017 9:14 AM

Workbook: E:\Cirrus Workbooks\20161130\20161130.plw

### Sample Details

Sample Name: S-24

Acquired: 10/24/2017 3:18:13 AM

By Analyst: HTGPC

Batch Name: SXL

Concentration: 0.10

Injection Volume: 200.0  $\mu$ l K of Sample: 14.1000

Alpha of Sample:

Analysis Using Method: PS2016113001

0.7000

### Calibration Used: 8/12/2017 3:25:40 PM

Calibration Type: Narrow Standard Curve Fit Used: 1

K: 14.1000

Alpha: 0.7000

Calibration Curve:  $y = 13.269036 - 0.643042x^{\wedge}1$

High Limit MW RT: 10.27 mins

Low Limit MW RT: 16.37 mins

Flow Marker RT: 0.00 mins

FRCF: 1.0000

FRM Name:

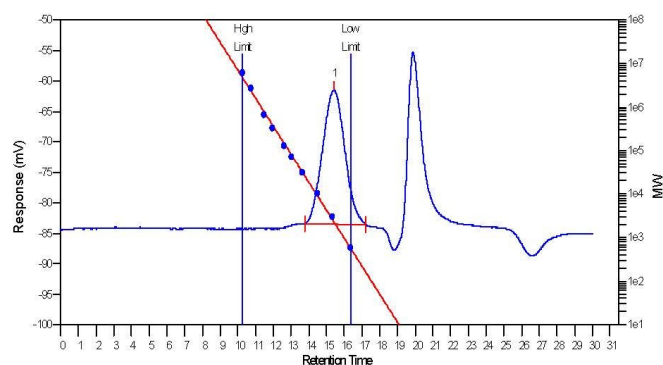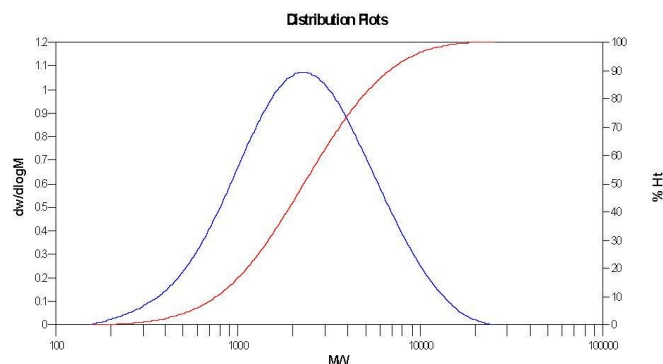

### MW Averages

| Peak No | Mp   | Mn   | Mw   | Mz   | Mz+1 | Mv   | PD      |
|---------|------|------|------|------|------|------|---------|
| 1       | 2267 | 1572 | 3149 | 5644 | 8585 | 2857 | 2.00318 |

### Processed Peaks

| Peak No | Name | Start RT (mins) | Max RT (mins) | End RT (mins) | Pk Height (mV) | % Height | Area (mV.secs) | % Area |
|---------|------|-----------------|---------------|---------------|----------------|----------|----------------|--------|
| 1       |      | 13.78           | 15.42         | 17.22         | 21.9909        | 0        | 1909.54        | 100    |

**Figure S31.** GPC of the copolymer generated by complex **Ni3** from table 2, entry 8.

## Cirrus GPC Sample Injection Report

Generated by: HTGPC

Thursday, October 26, 2017 9:13 AM

Workbook: E:\Cirrus Workbooks\20161130\20161130.plw

### Sample Details

Sample Name: S-21

Acquired: 10/24/2017 1:37:27 AM

By Analyst: HTGPC

Batch Name: SXL

Concentration: 0.10

Injection Volume: 200.0 uL of Sample: 14.1000

Alpha of Sample:

Analysis Using Method: PS2016113001

0.7000

### Calibration Used: 8/12/2017 3:25:40 PM

Calibration Type: Narrow Standard Curve Fit Used: 1

K: 14.1000

Alpha: 0.7000

Calibration Curve:  $y = 13.269036 - 0.643042x^{*1}$

High Limit MW RT: 10.27 mins

Low Limit MW RT: 16.37 mins

Flow Marker RT: 0.00 mins

FRCF: 1.0000

FRM Name:

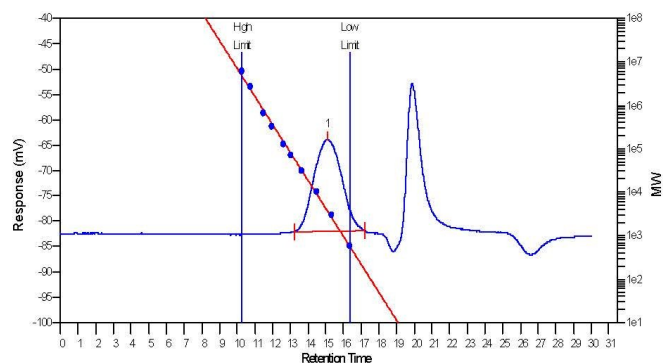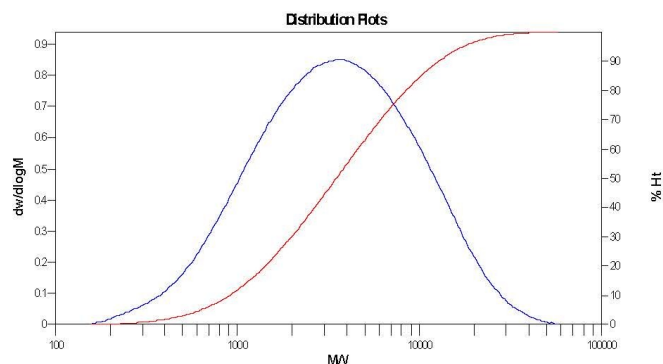

### MW Averages

| Peak No | Mp   | Mn   | Mw   | Mz    | Mz+1  | Mv   | PD      |
|---------|------|------|------|-------|-------|------|---------|
| 1       | 3713 | 2042 | 5451 | 11655 | 18951 | 4769 | 2.66944 |

### Processed Peaks

| Peak No | Name | Start RT (mins) | Max RT (mins) | End RT (mins) | Pk Height (mV) | % Height | Area (mV.secs) | % Area |
|---------|------|-----------------|---------------|---------------|----------------|----------|----------------|--------|
| 1       |      | 13.23           | 15.08         | 17.22         | 18.017         | 0        | 1974.58        | 100    |

**Figure S32.** GPC of the copolymer generated by complex **Ni3** from table 2, entry 9.

## 5. X-Ray Crystallography of complex Ni-1.

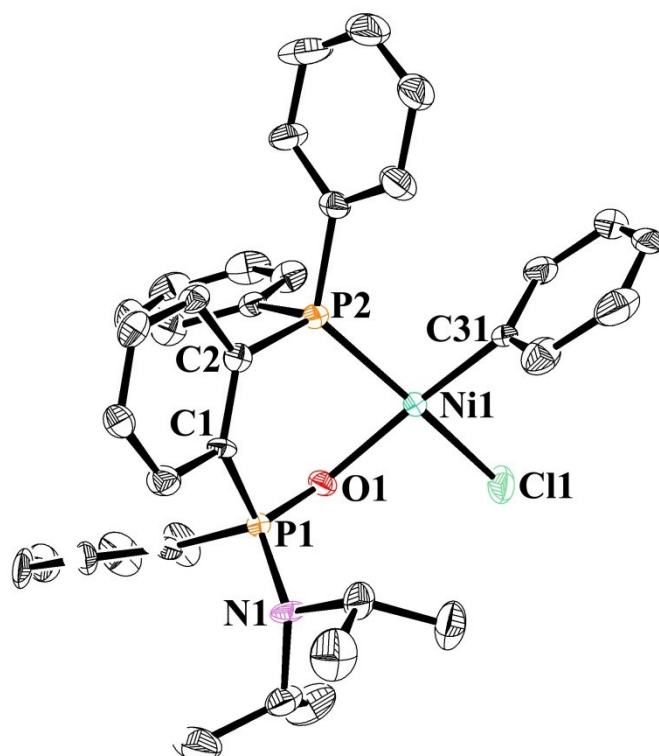

| Entry                                    | Ni1                                                      |
|------------------------------------------|----------------------------------------------------------|
| Formula                                  | C <sub>36</sub> H <sub>38</sub> Cl N Ni O P <sub>2</sub> |
| Formula weight                           | 656.77                                                   |
| Temperature[K]                           | 298(2)                                                   |
| $\lambda(\text{Mo-K}\alpha)[\text{\AA}]$ | 0.71073                                                  |
| Crystal system                           | Monoclinic                                               |
| Space group                              | P2(1)/c                                                  |
| a[ $\text{\AA}$ ]                        | 17.7789(14)                                              |
| b[ $\text{\AA}$ ]                        | 11.3500(9)                                               |
| c[ $\text{\AA}$ ]                        | 16.4332(13)                                              |
| $\alpha[^\circ]$                         | 90.00                                                    |
| $\beta[^\circ]$                          | 95.6100(10)                                              |
| $\gamma[^\circ]$                         | 90.00                                                    |
| Volume[ $\text{\AA}^3$ ]                 | 3300.2(5)                                                |
| Z                                        | 4                                                        |
| D(calc)[ $\text{g}\cdot\text{cm}^{-3}$ ] | 1.322                                                    |
| $\mu[\text{mm}^{-1}]$                    | 0.795                                                    |
| F(000)                                   | 1376                                                     |
| $\theta$ min-max ( $^\circ$ )            | 2.412-27.039                                             |
| <i>h</i>                                 | -21 $\rightarrow$ 20                                     |
| <i>k</i>                                 | -10 $\rightarrow$ 13                                     |

|                                             |                                 |
|---------------------------------------------|---------------------------------|
| <i>l</i>                                    | -19→15                          |
| Reflections collected                       | 16009                           |
| Reflections unique                          | 5824                            |
| R(int)                                      | 0.0415                          |
| Data / restraints / parameters              | 5824 / 0 / 383                  |
| Final R indices [ <i>I</i> >2σ( <i>I</i> )] | <i>R</i> <sub>1</sub> = 0.0496  |
|                                             | <i>wR</i> <sub>2</sub> = 0.1264 |
| R indices (all data)                        | <i>R</i> <sub>1</sub> = 0.0923  |
|                                             | <i>wR</i> <sub>2</sub> = 0.1521 |
| GOF on <i>F</i> <sup>2</sup>                | 1.034                           |

## 6. X-Ray Crystallography of complex Ni-3.

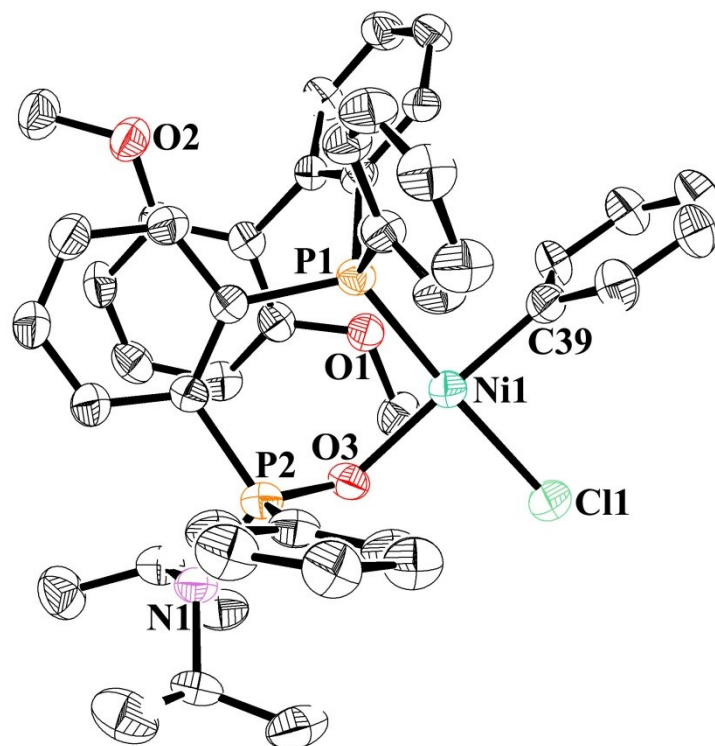

| Entry                         | Ni3                   |
|-------------------------------|-----------------------|
| Formula                       | C44 H46 Cl N Ni O3 P2 |
| Formula weight                | 792.92                |
| Temperature[K]                | 293(2)                |
| $\lambda$ (Mo-K $\alpha$ )[Å] | 1.54178               |
| Crystal system                | Monoclinic            |
| Space group                   | P2(1)/n               |
| <i>a</i> [Å]                  | 17.4215(12)           |
| <i>b</i> [Å]                  | 14.7742(9)            |
| <i>c</i> [Å]                  | 19.0672(15)           |

|                                    |                          |
|------------------------------------|--------------------------|
| $\alpha$ [°]                       | 90.00                    |
| $\beta$ [°]                        | 90.882(2)                |
| $\gamma$ [°]                       | 90.00                    |
| Volume [Å <sup>3</sup> ]           | 4907.1(6)                |
| Z                                  | 4                        |
| D(calc) [g·cm <sup>-3</sup> ]      | 1.073                    |
| $\mu$ [mm <sup>-1</sup> ]          | 1.943                    |
| F(000)                             | 1664                     |
| $\theta$ min-max (°)               | 3.4090 -67.3150          |
| <i>h</i>                           | -16→20                   |
| <i>k</i>                           | -17→11                   |
| <i>l</i>                           | -22→19                   |
| Reflections collected              | 16694                    |
| Reflections unique                 | 4777                     |
| R(int)                             | 0.0882                   |
| Data / restraints / parameters     | 8555 / 0 / 521           |
| Final R indices [I>2 $\sigma$ (I)] | R <sub>1</sub> = 0.0680  |
|                                    | wR <sub>2</sub> = 0.1399 |
| R indices (all data)               | R <sub>1</sub> = 0.1038  |
|                                    | wR <sub>2</sub> = 0.1175 |
| GOF on F <sup>2</sup>              | 1.054                    |

## 7. X-Ray Crystallography of complex Ni1-Br.

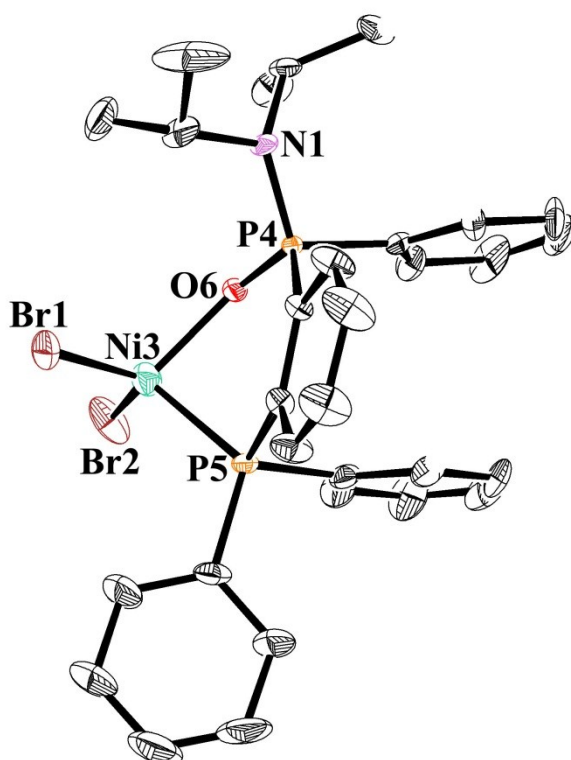

| Entry                                    | Ni1-Br                |
|------------------------------------------|-----------------------|
| Formula                                  | C30 H33 Br2 N Ni O P2 |
| Formula weight                           | 704.04                |
| Temperature[K]                           | 298(2)                |
| $\lambda(\text{Mo-K}\alpha)[\text{\AA}]$ | 0.71073               |
| Crystal system                           | Orthorhombic          |
| Space group                              | P2(1)2(1)2(1)         |
| a[ $\text{\AA}$ ]                        | 11.2291(9)            |
| b[ $\text{\AA}$ ]                        | 15.8955(12)           |
| c[ $\text{\AA}$ ]                        | 17.3816(13)           |
| $\alpha[^\circ]$                         | 90.00                 |
| $\beta[^\circ]$                          | 90.00                 |
| $\gamma[^\circ]$                         | 90.00                 |
| Volume[ $\text{\AA}^3$ ]                 | 3102.5(4)             |
| Z                                        | 4                     |
| D(calc)[ $\text{g}\cdot\text{cm}^{-3}$ ] | 1.507                 |
| $\mu[\text{mm}^{-1}]$                    | 3.327                 |
| F(000)                                   | 1424                  |
| $\theta$ min-max ( $^\circ$ )            | 2.22 -25.02           |
| <i>h</i>                                 | -11 $\rightarrow$ 13  |
| <i>k</i>                                 | -18 $\rightarrow$ 8   |
| <i>l</i>                                 | -20 $\rightarrow$ 19  |
| Reflections collected                    | 15721                 |

|                                      |                                   |
|--------------------------------------|-----------------------------------|
| Reflections unique                   | 5444                              |
| R(int)                               | 0.0581                            |
| Data / restraints / parameters       | 5444 / 0 / 368                    |
| Final R indices [ $I > 2\sigma(I)$ ] | $R_1 = 0.0526$<br>$wR_2 = 0.1357$ |
| R indices (all data)                 | $R_1 = 0.0830$<br>$wR_2 = 0.1553$ |
| GOF on $F^2$                         | 1.094                             |
